# Supplementary material for: An Integrated Assessment of European Soil Health and Restoration potential
Source: Research Square preprint supplement (doi:10.21203/rs.3.rs-8660880/v1), 2026-01-28
Supplement: Supplementary file 1 [file c4120293470108a024a830ee.pdf]

## Supplementary data 1

### Data produced from:

Calderón-Sanou *et al.* **An Integrated Assessment of European Soil Health and Restoration potential.**

### File content :

Maps of the spatial distribution of the indicators of functional diversity (Fig. S1- Fig. S23, including maps of the overall diversity of each kingdom of life) and ecosystem functions (Fig. S24 – Fig. S30) for both the current status and the undisturbed reference status.

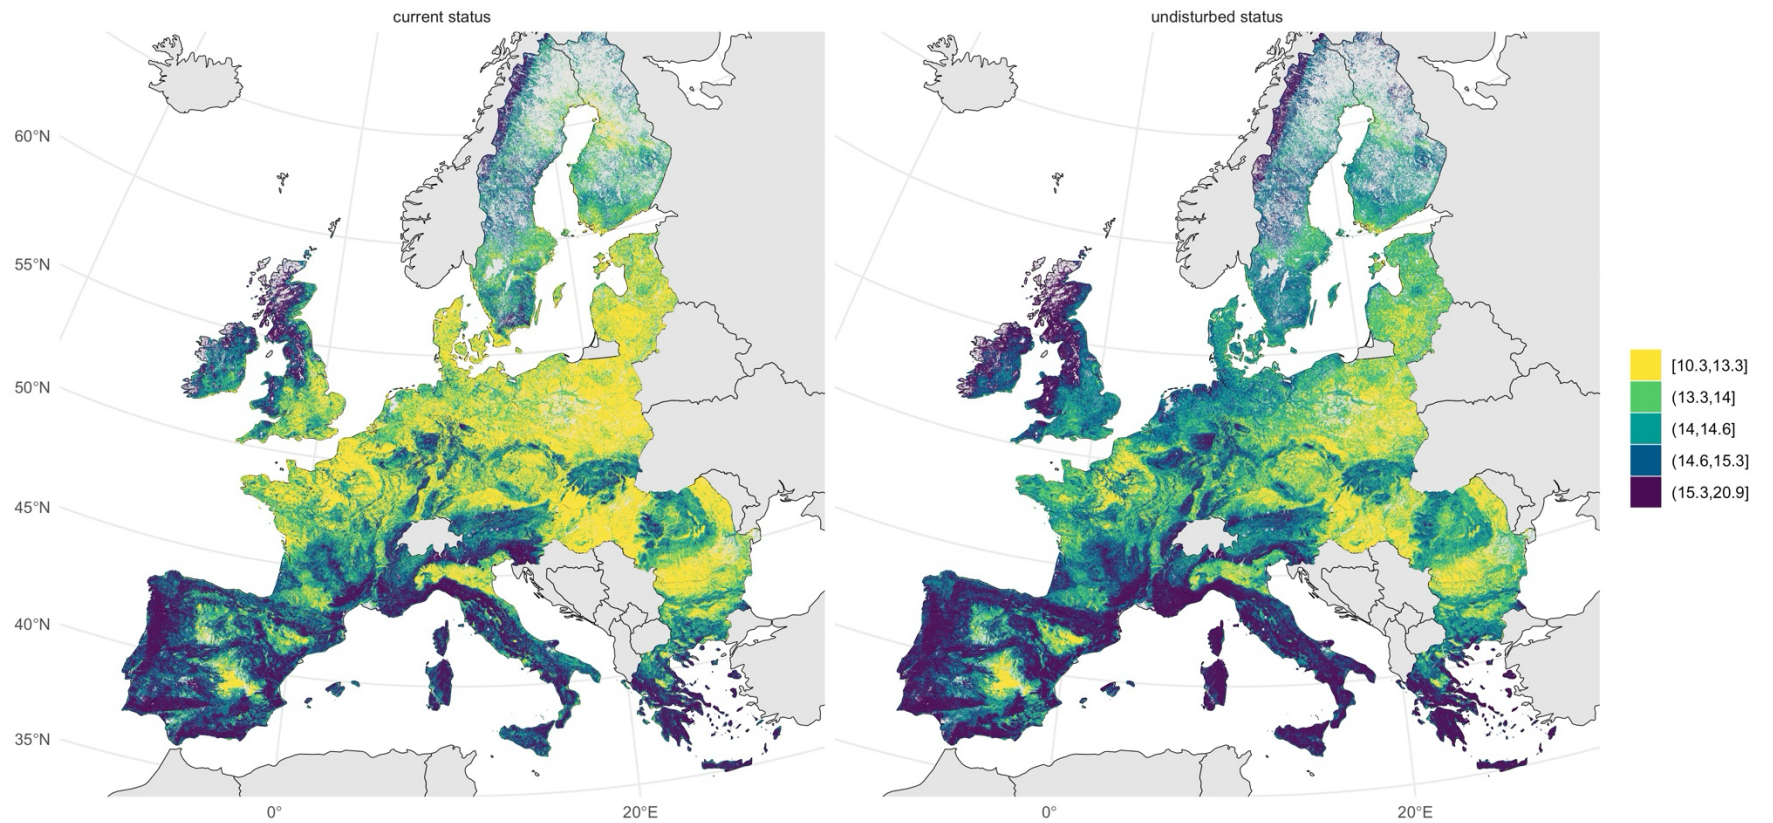

**Figure S1.** Spatial distribution of Metazoa diversity in Europe for the current status (right panel) and the undisturbed reference status (left panel).

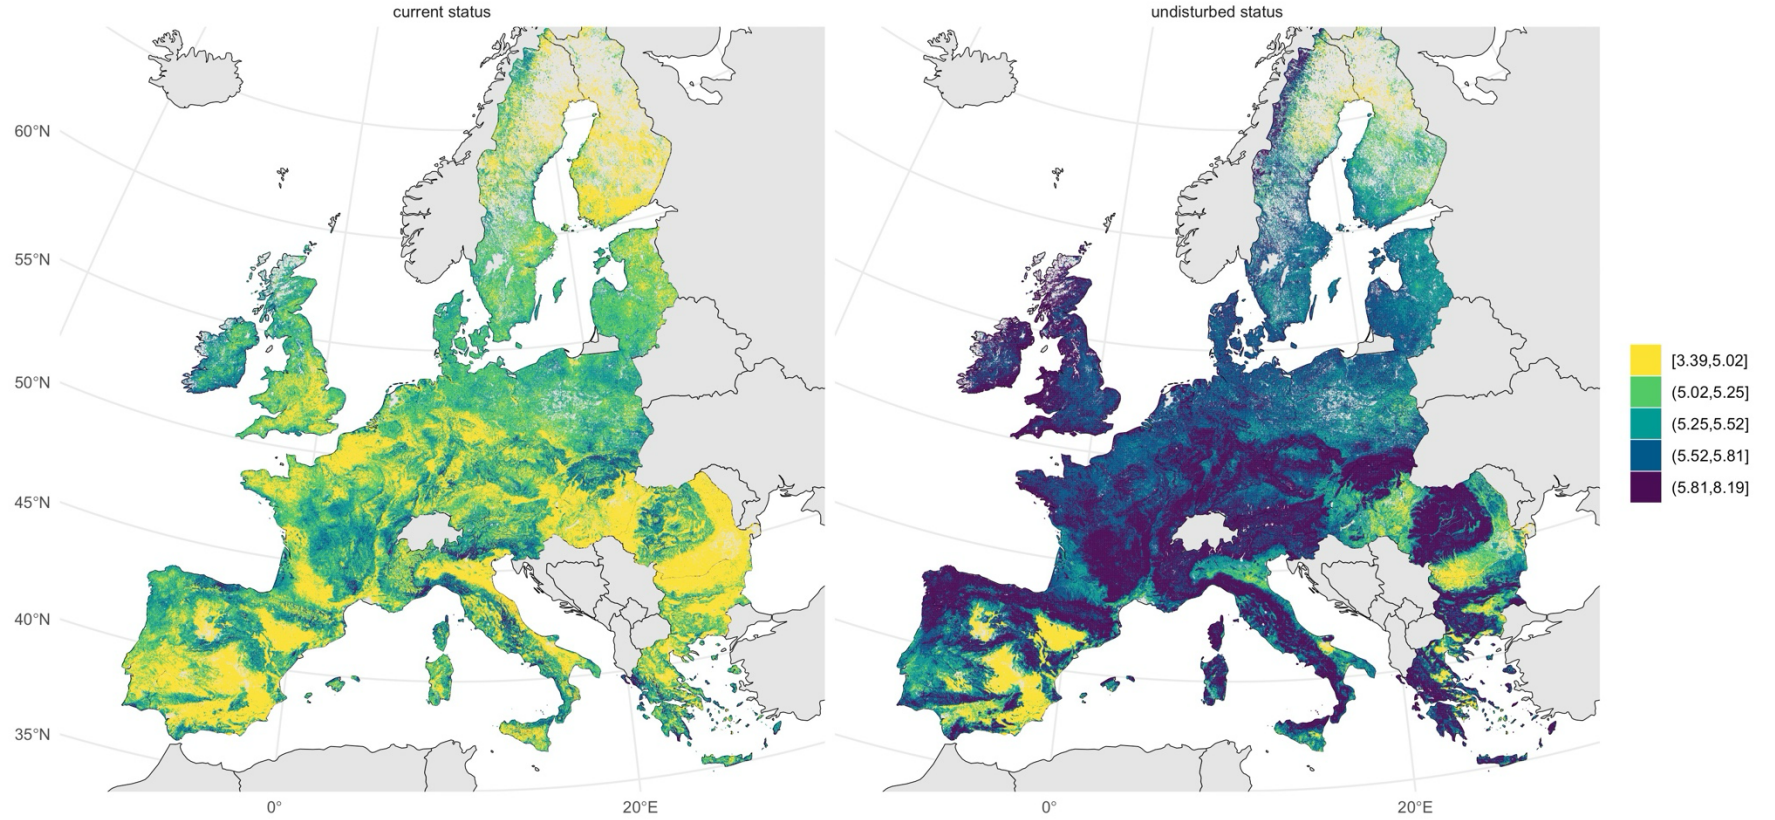

**Figure S2.** Spatial distribution of the diversity of nematodes bacterivores in Europe for the current status (right panel) and the undisturbed reference status (left panel).

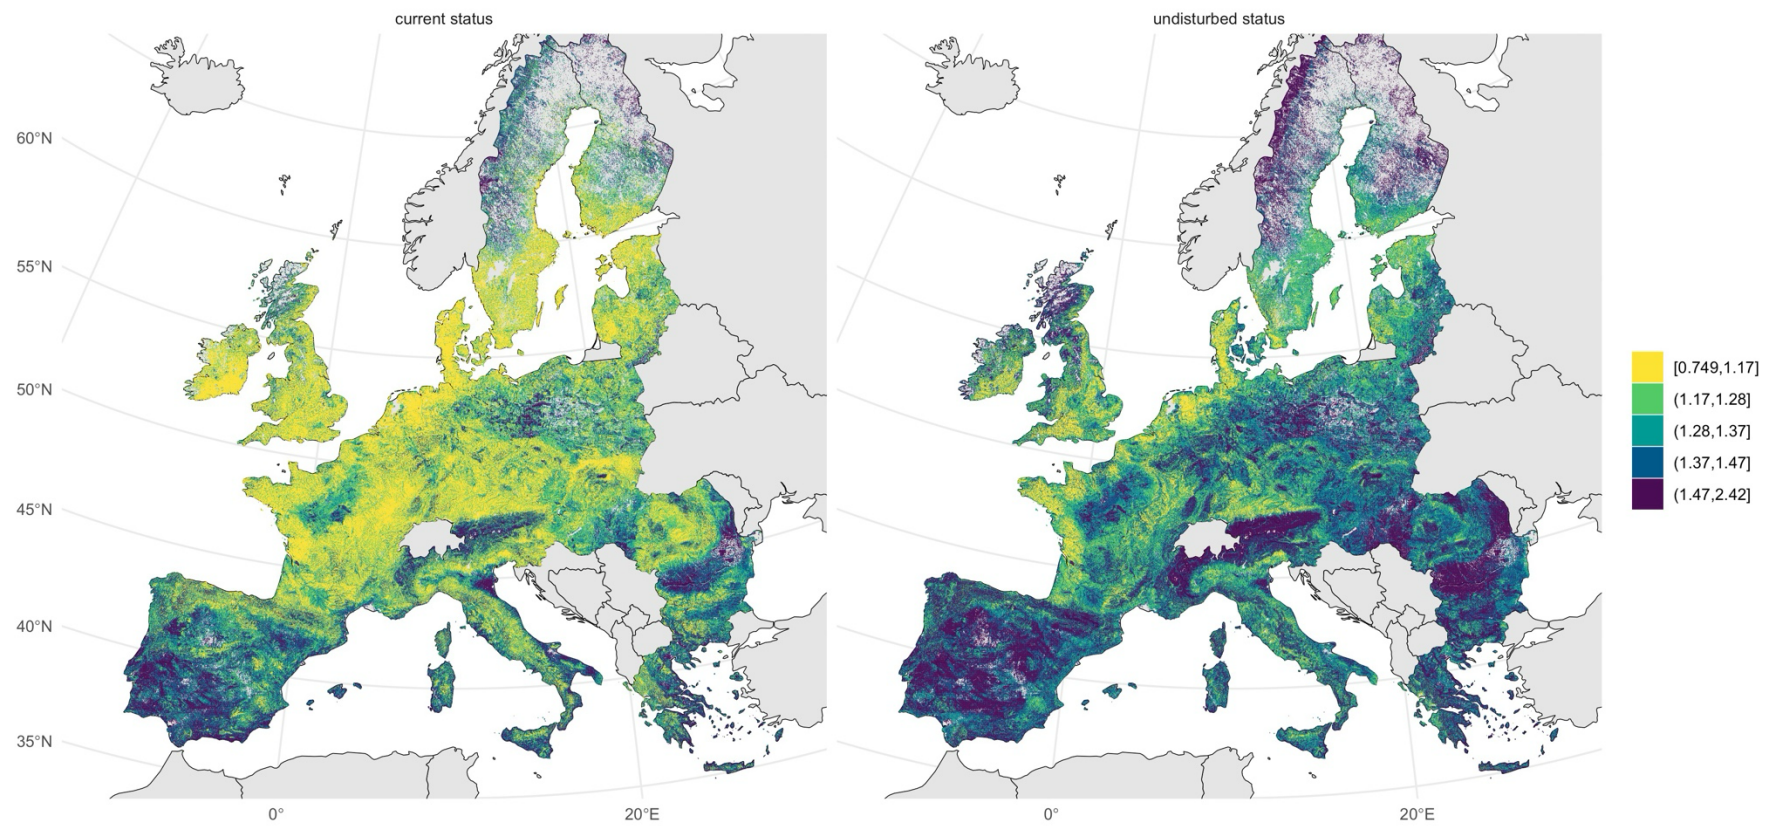

**Figure S3.** Spatial distribution of the diversity of nematodes fungivores in Europe for the current status (right panel) and the undisturbed reference status (left panel).

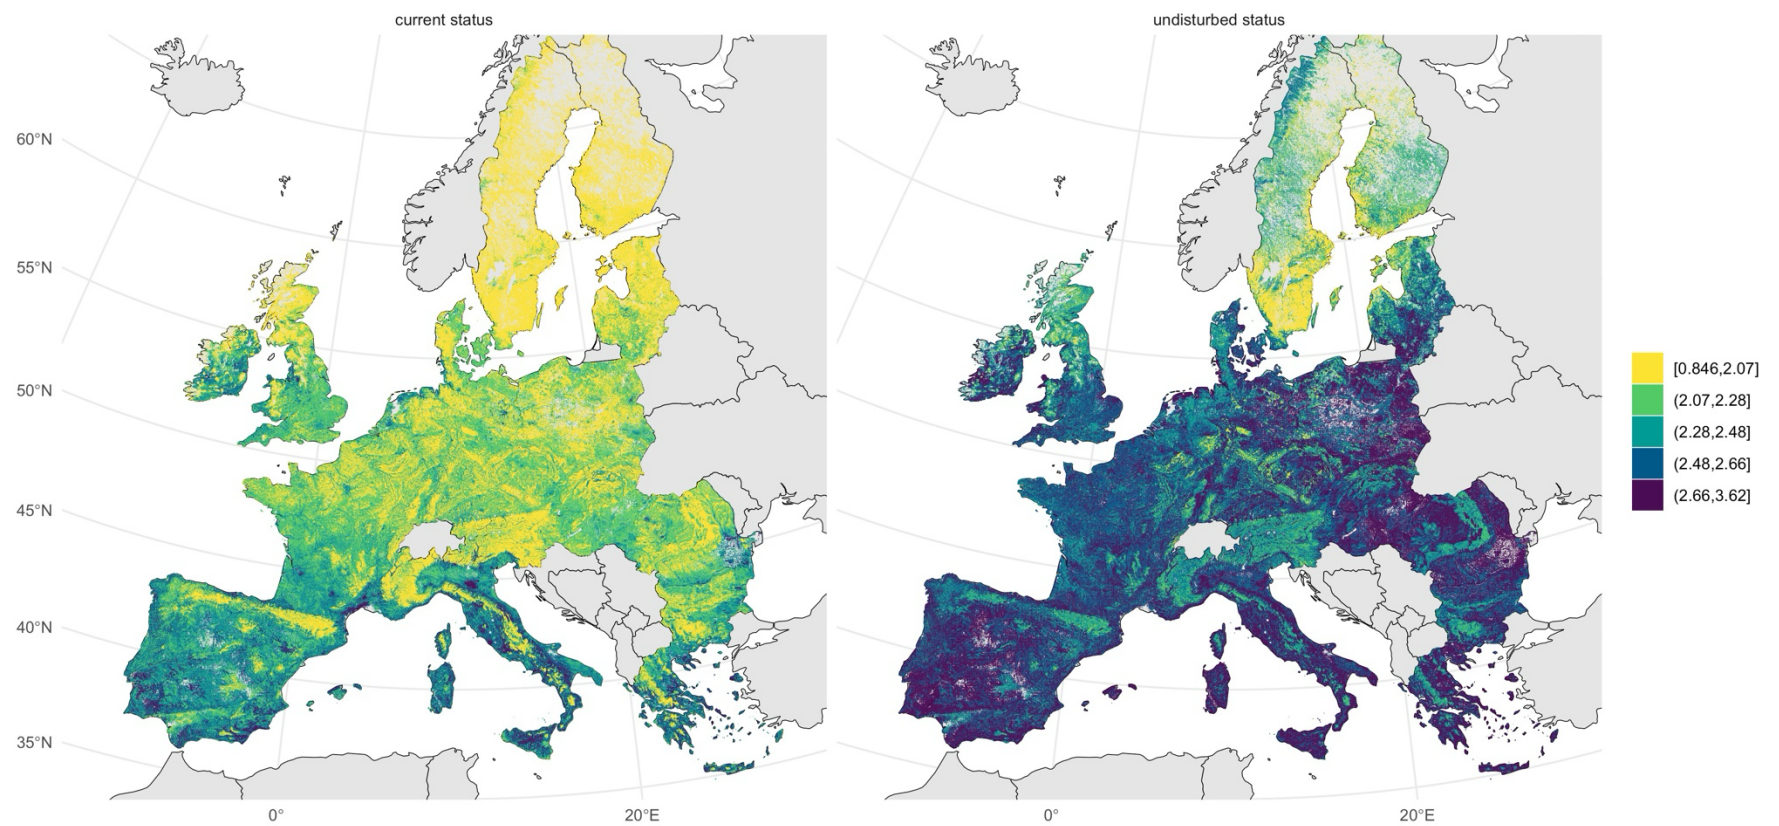

**Figure S4.** Spatial distribution of the diversity of nematodes herbivores in Europe for the current status (right panel) and the undisturbed reference status (left panel).

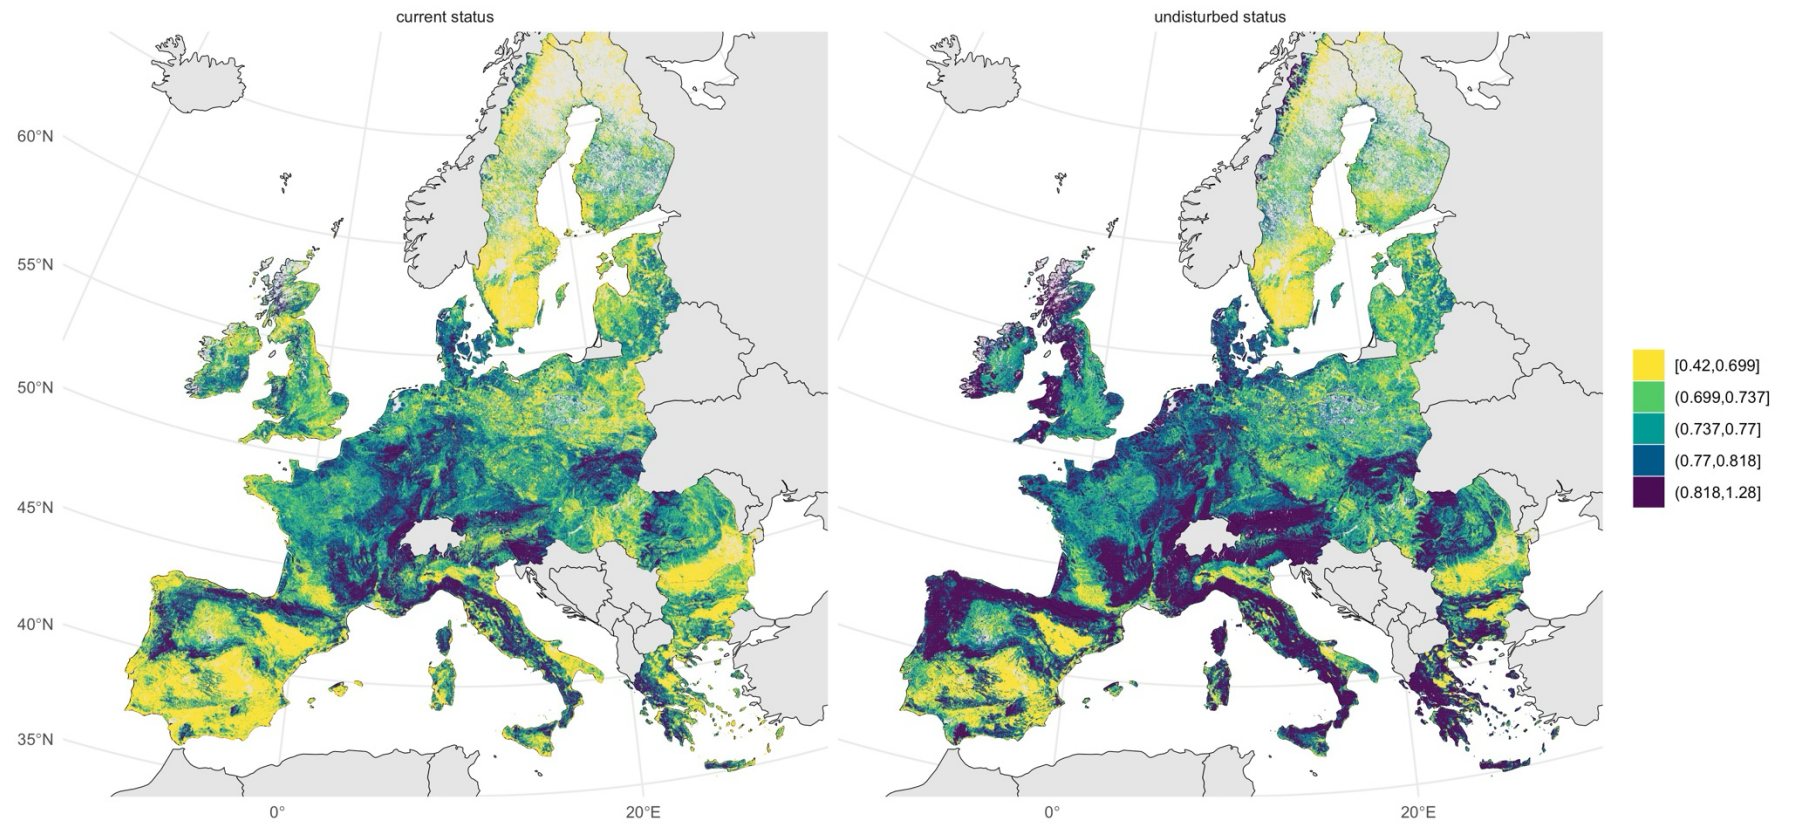

**Figure S5.** Spatial distribution of the diversity of nematodes predators in Europe for the current status (right panel) and the undisturbed reference status (left panel).

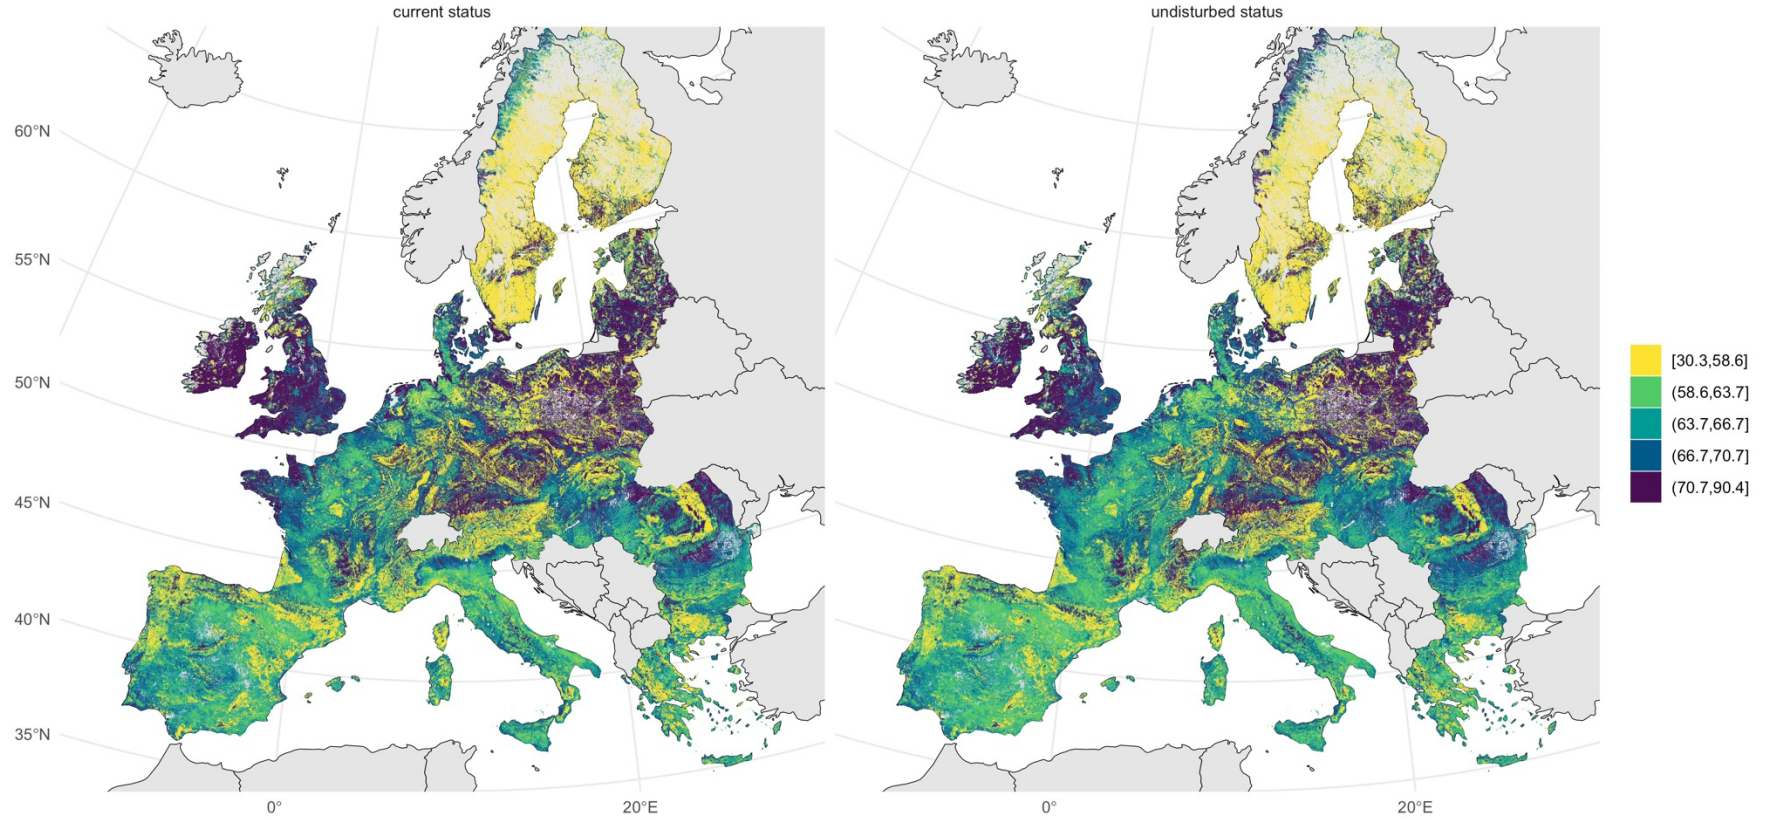

**Figure S6.** Spatial distribution of the diversity of Fungi in Europe for the current status (right panel) and the undisturbed reference status (left panel).

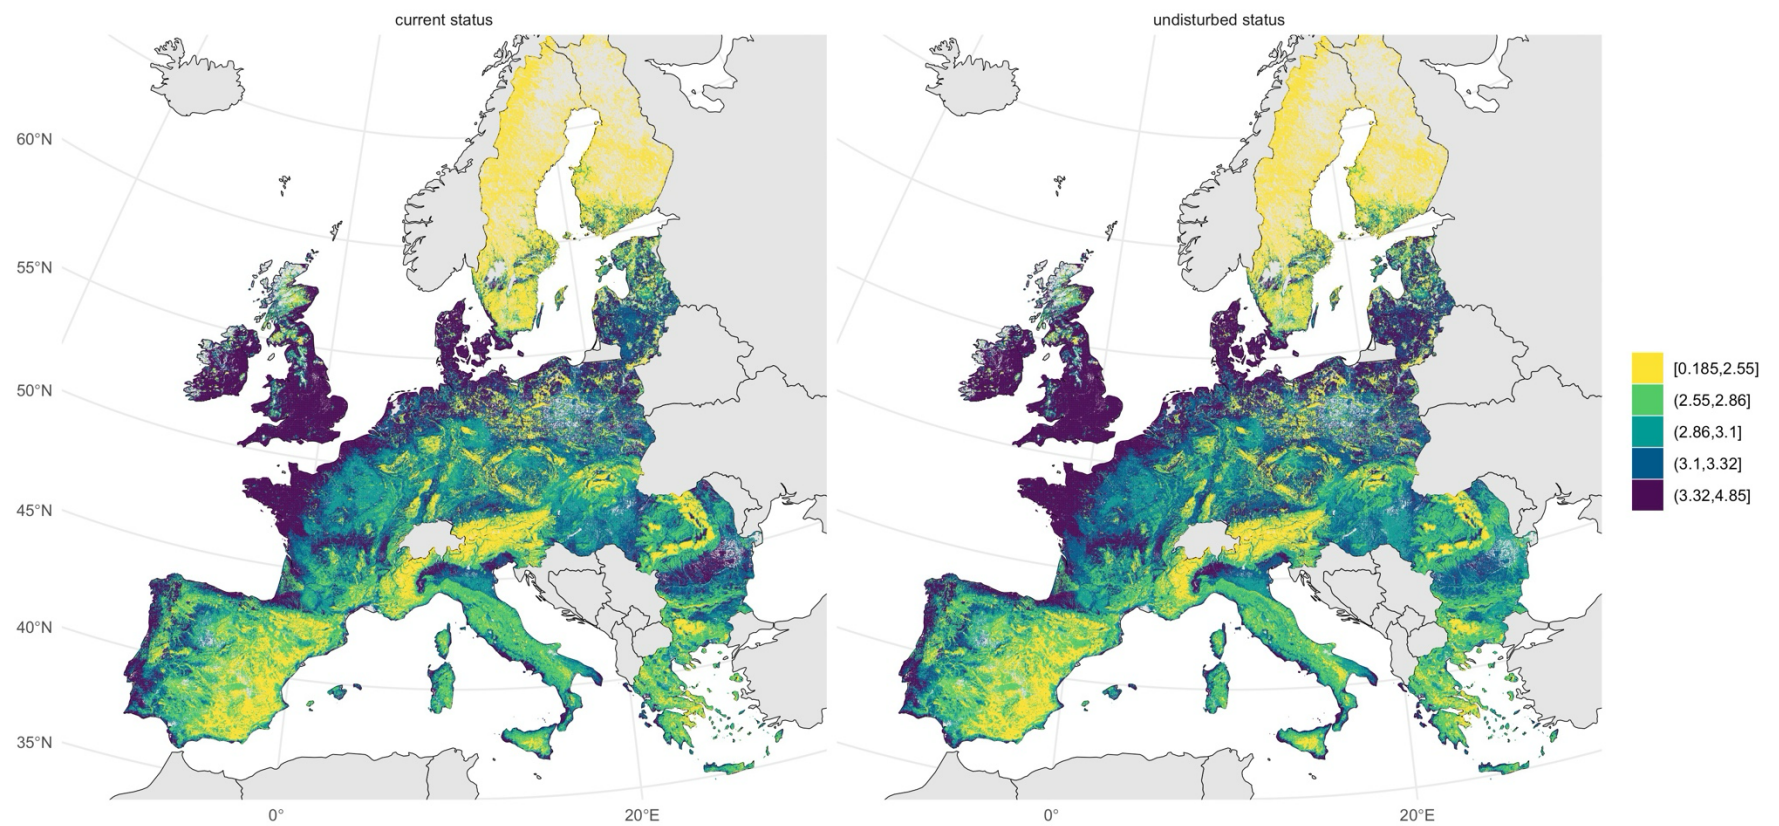

**Figure S7.** Spatial distribution of the diversity of animal parasitic fungi in Europe for the current status (right panel) and the undisturbed reference status (left panel).

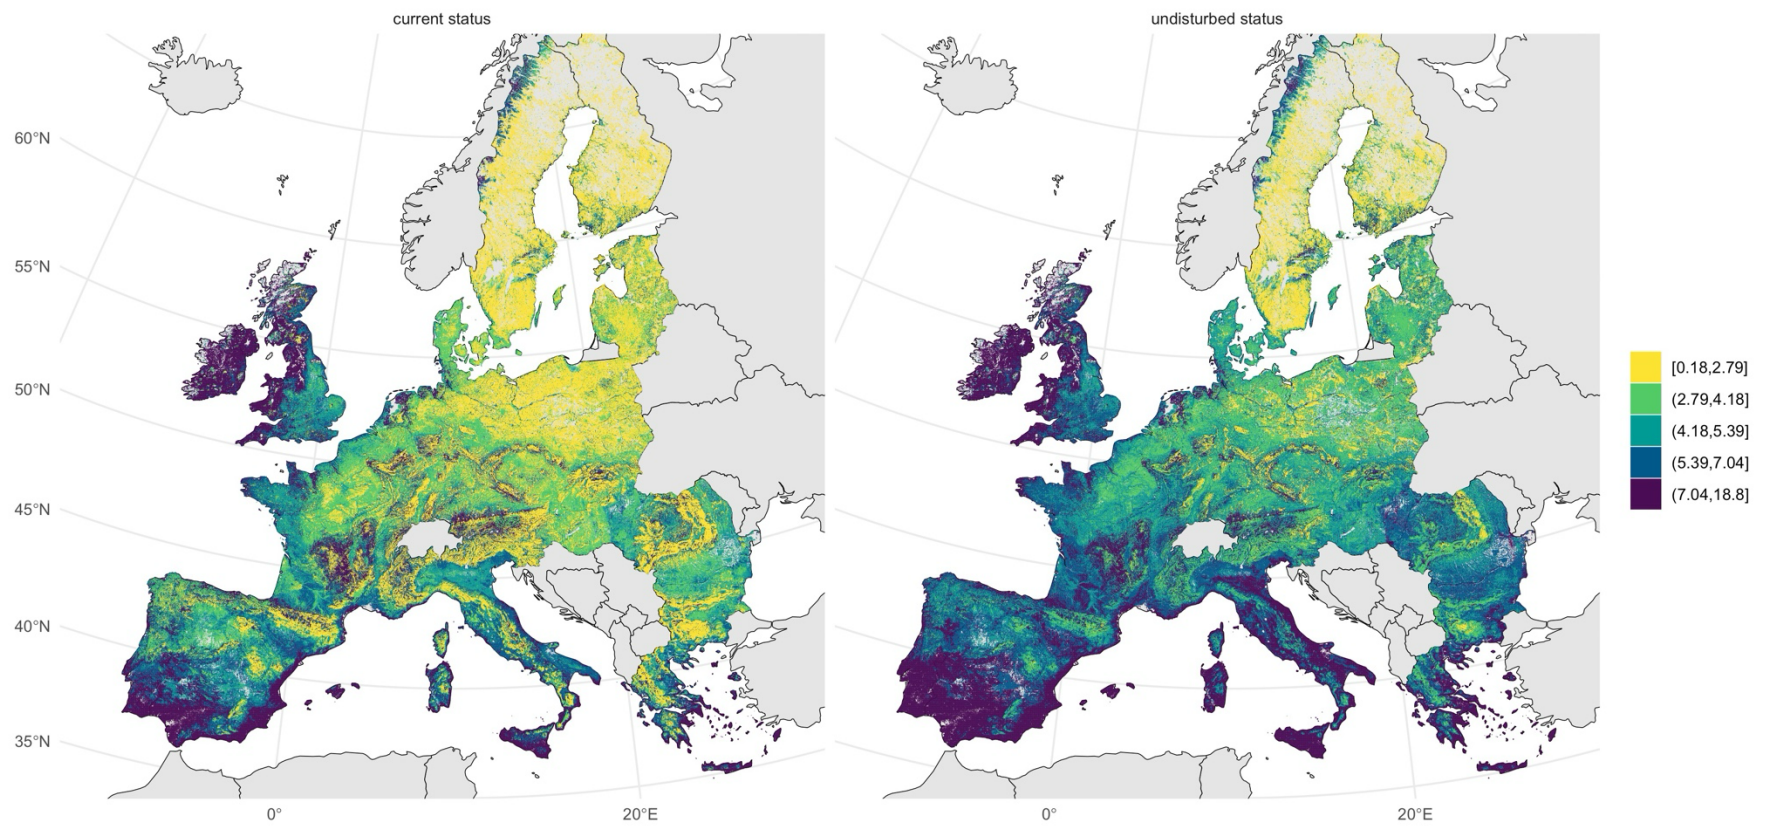

**Figure S8.** Spatial distribution of the diversity of arbuscular mycorrhizal fungi in Europe for the current status (right panel) and the undisturbed reference status (left panel).

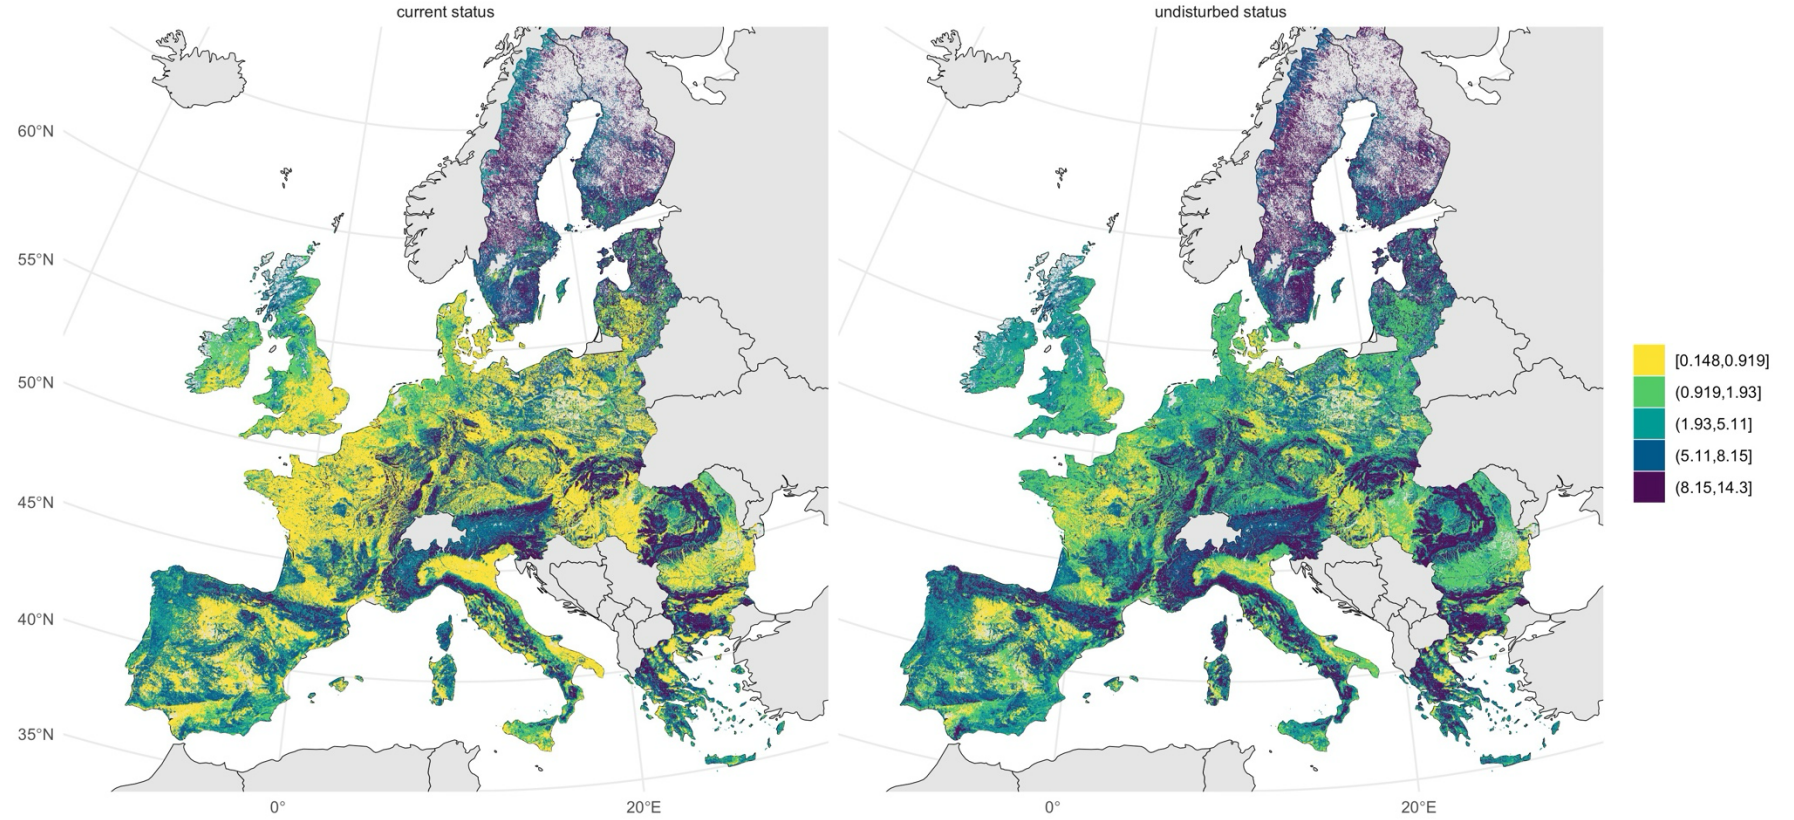

**Figure S9.** Spatial distribution of the diversity of ectomycorrhizal fungi in Europe for the current status (right panel) and the undisturbed reference status (left panel).

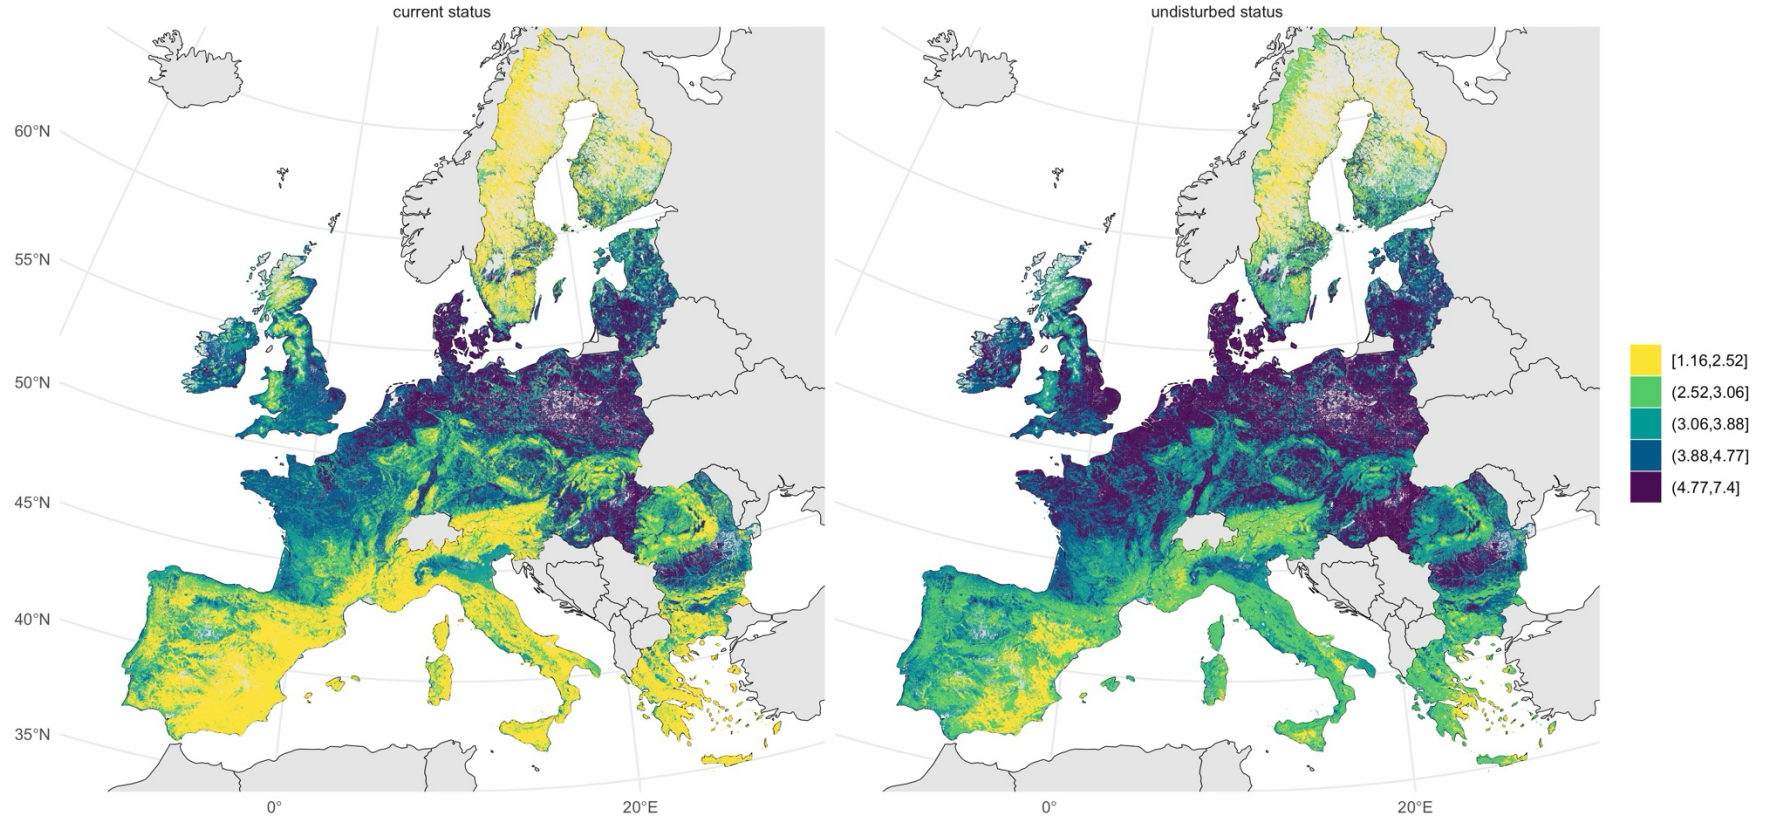

**Figure S10.** Spatial distribution of the diversity of mycoparasitic fungi in Europe for the current status (right panel) and the undisturbed reference status (left panel).

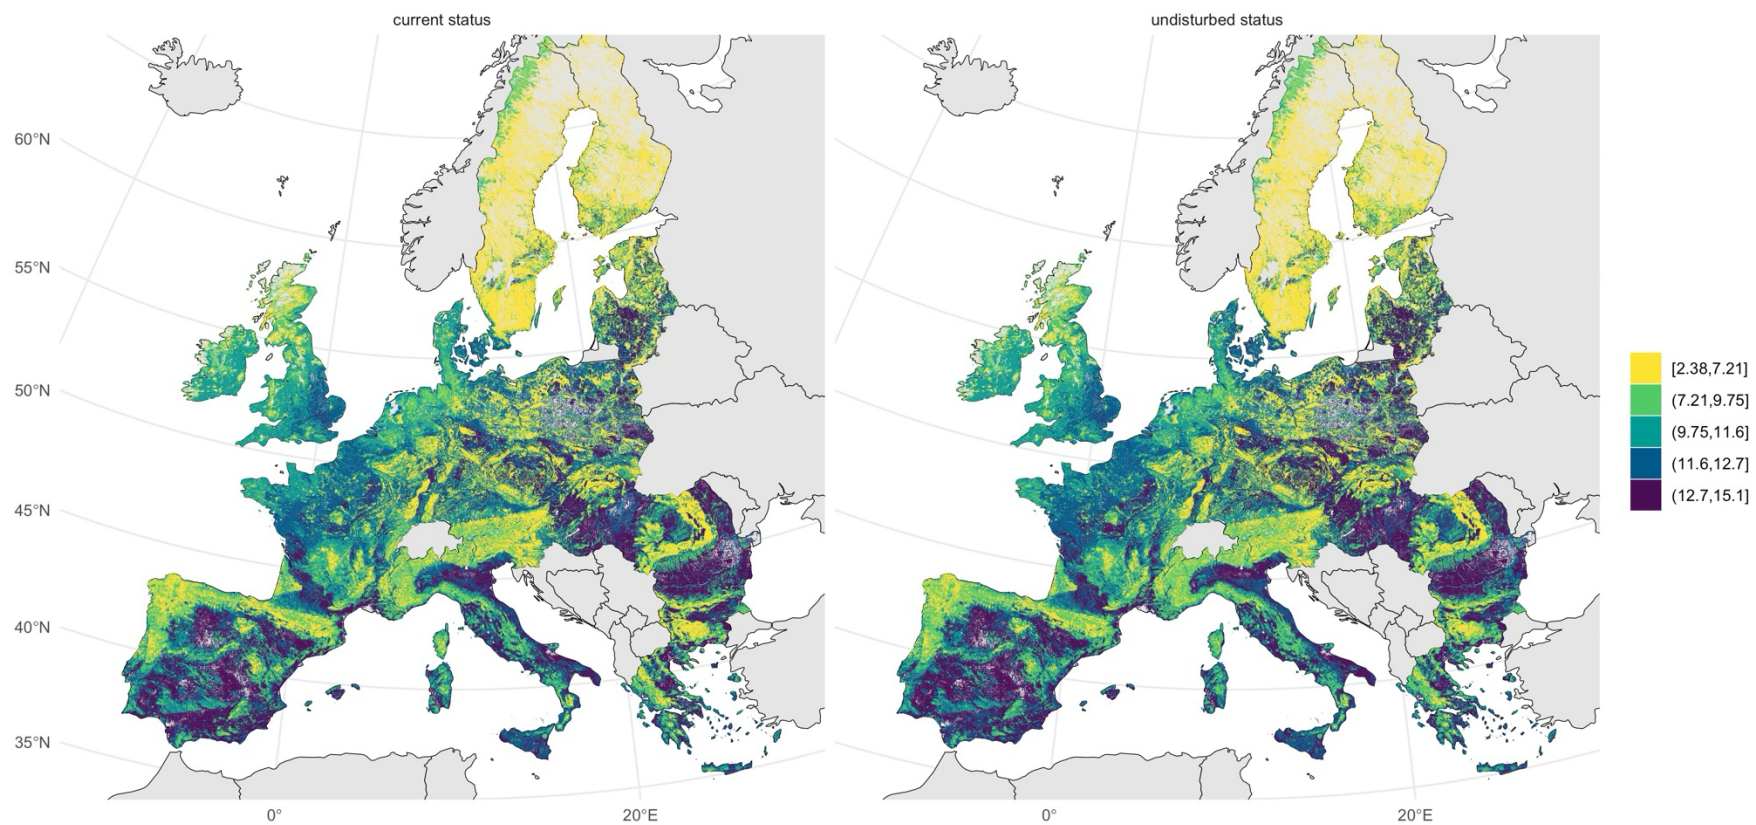

**Figure S11.** Spatial distribution of the diversity of plant pathogenic fungi in Europe for the current status (right panel) and the undisturbed reference status (left panel).

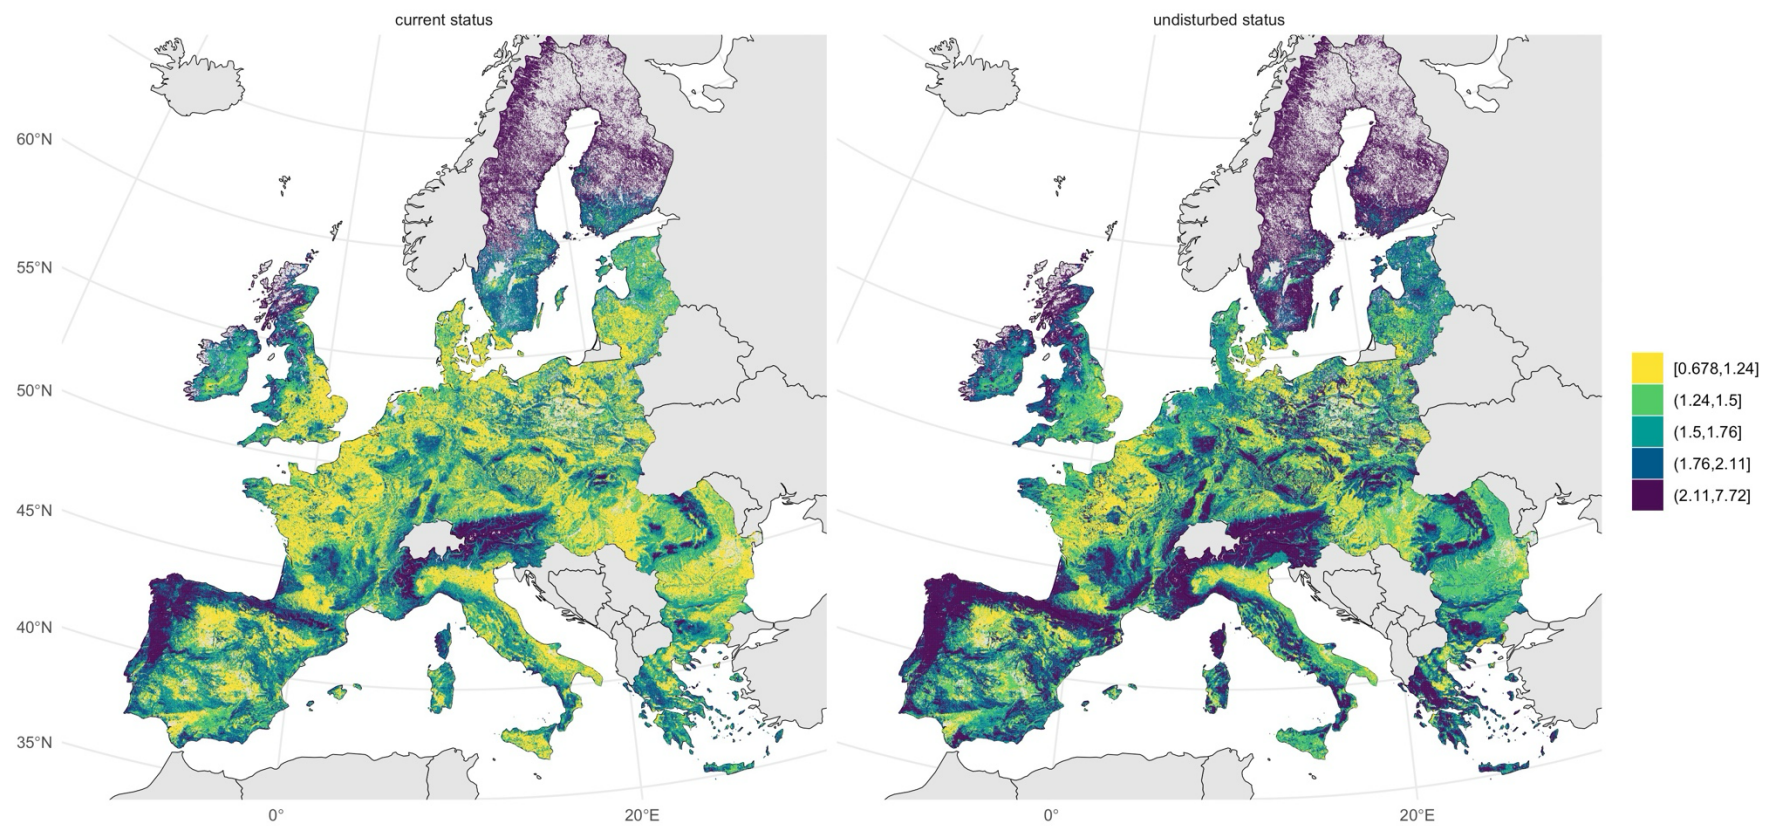

**Figure S12.** Spatial distribution of the diversity of root endophytic fungi in Europe for the current status (right panel) and the undisturbed reference status (left panel).

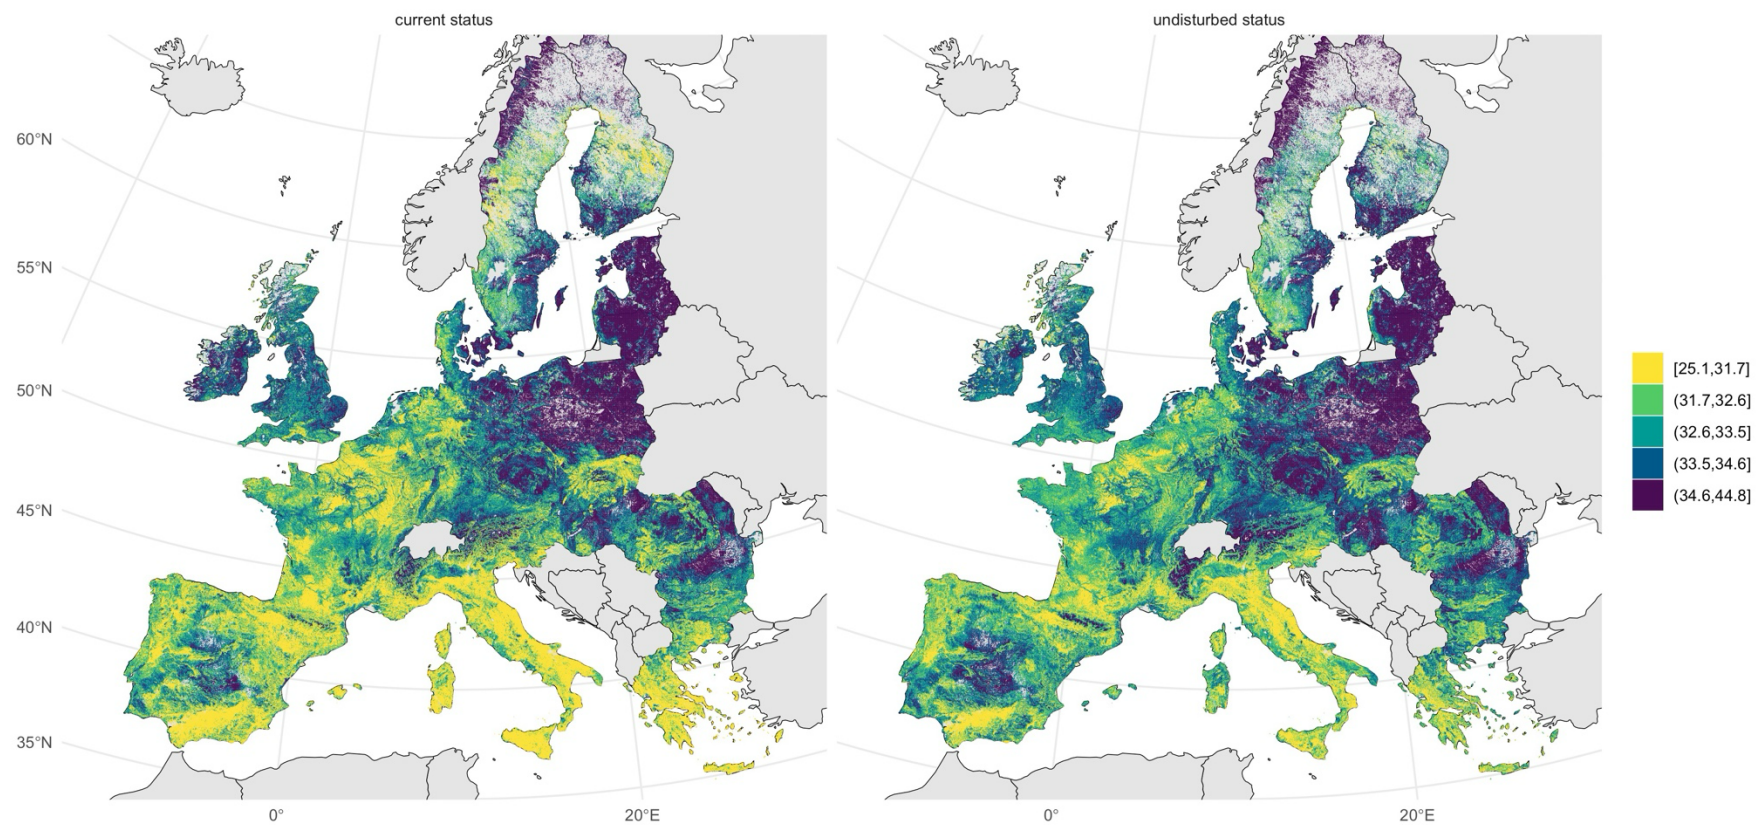

**Figure S13.** Spatial distribution of the diversity of saprotrophic fungi in Europe for the current status (right panel) and the undisturbed reference status (left panel).

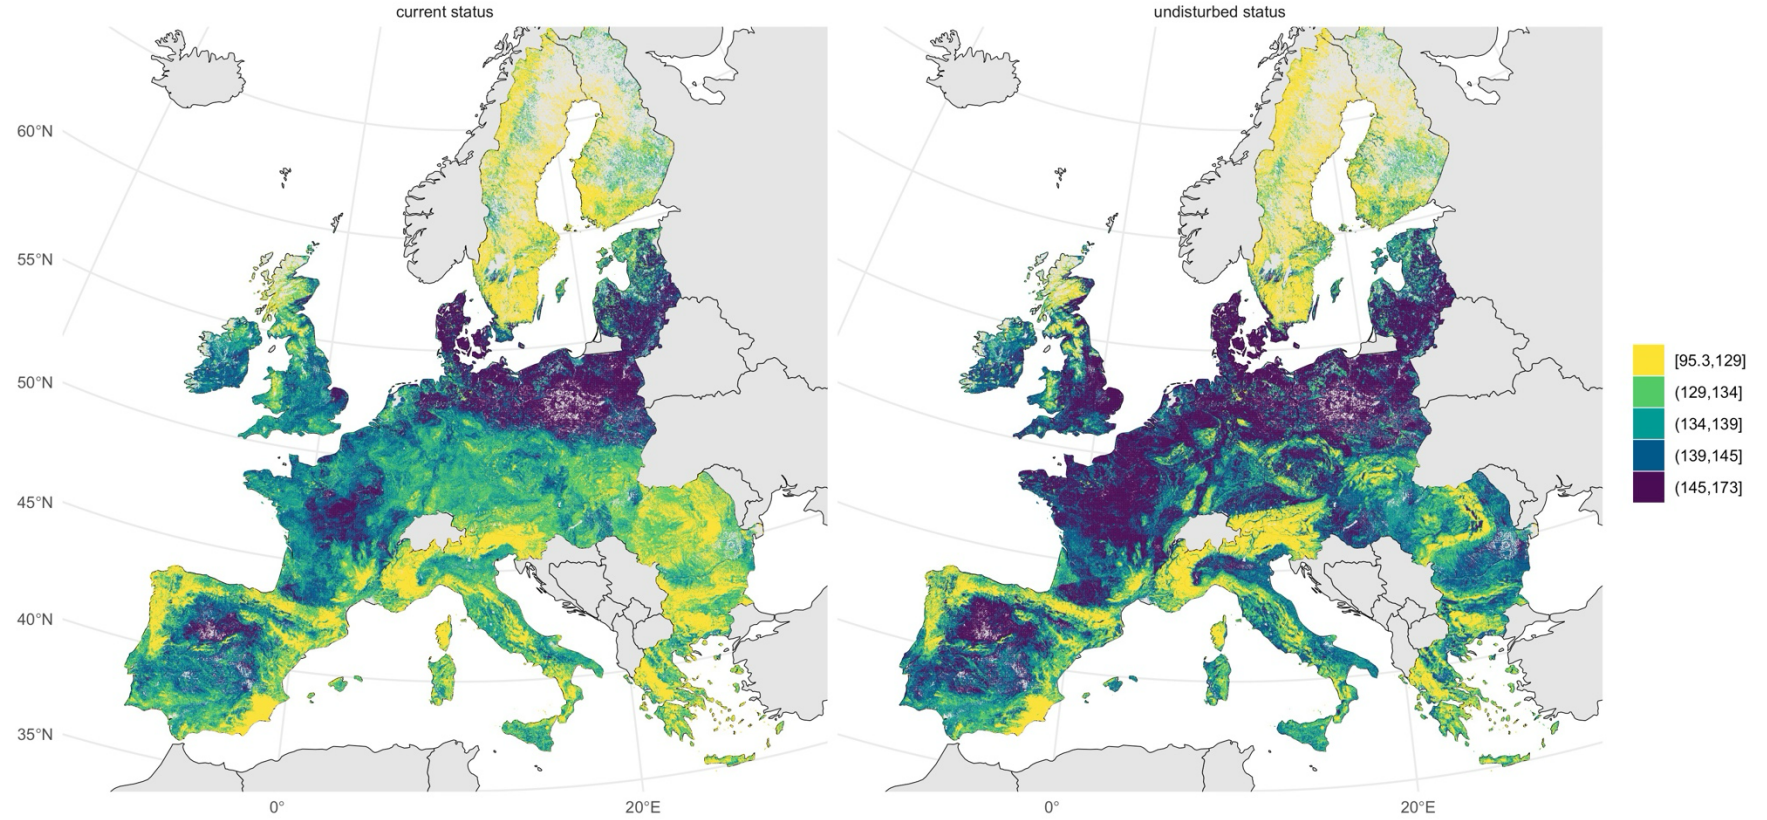

**Figure S14.** Spatial distribution of the diversity of Protists in Europe for the current status (right panel) and the undisturbed reference status (left panel).

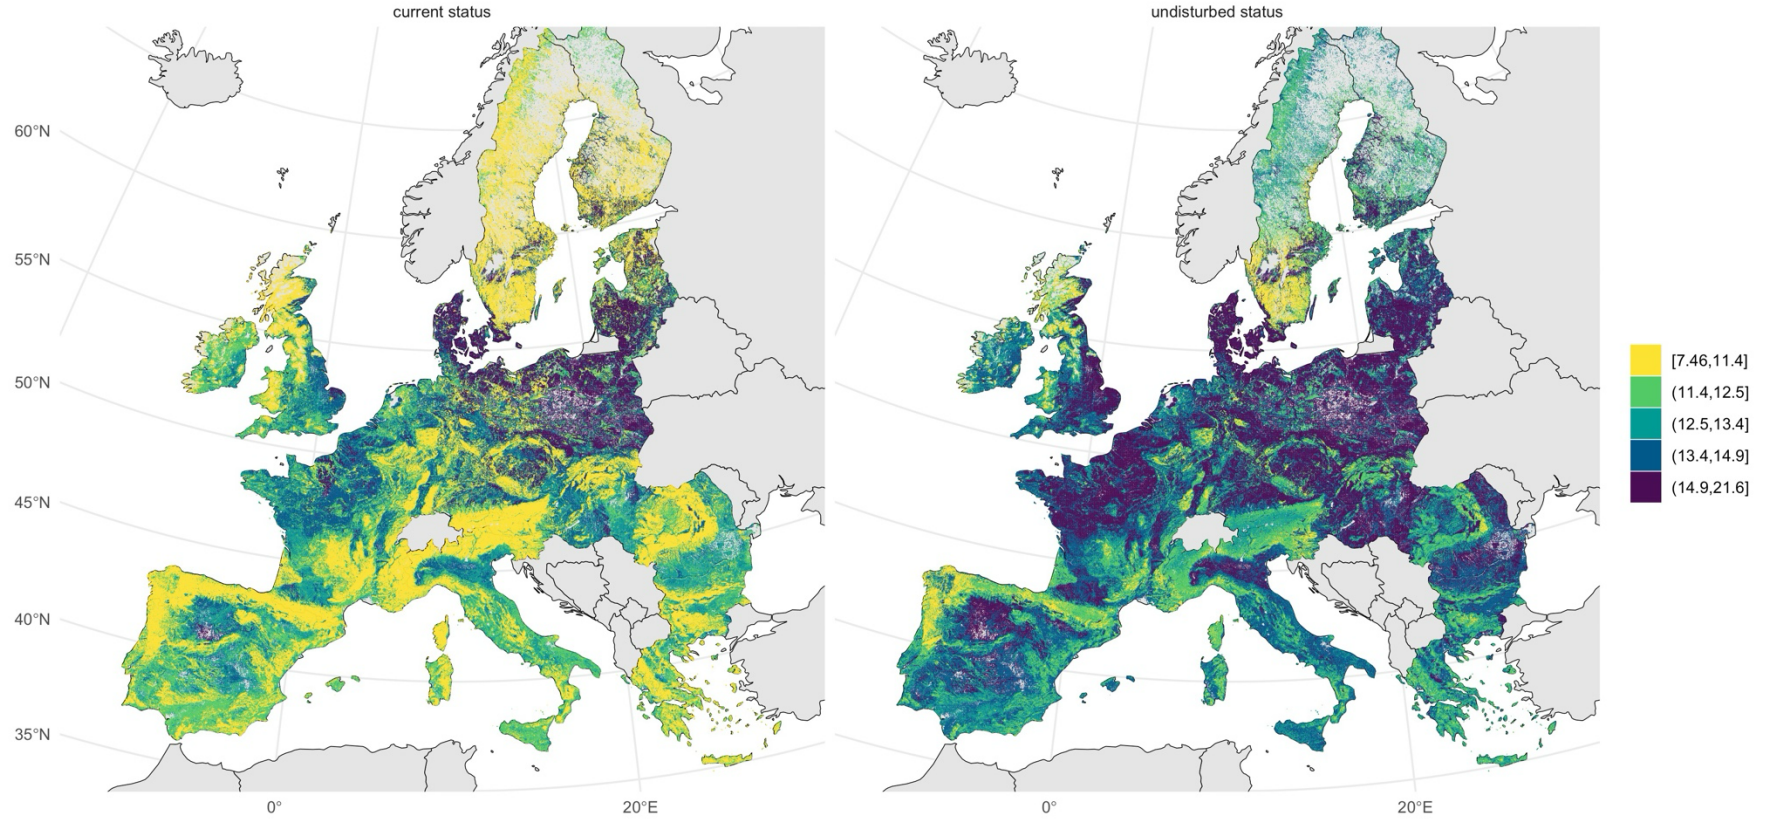

**Figure S15.** Spatial distribution of the diversity of photoautotrophic protists in Europe for the current status (right panel) and the undisturbed reference status (left panel).

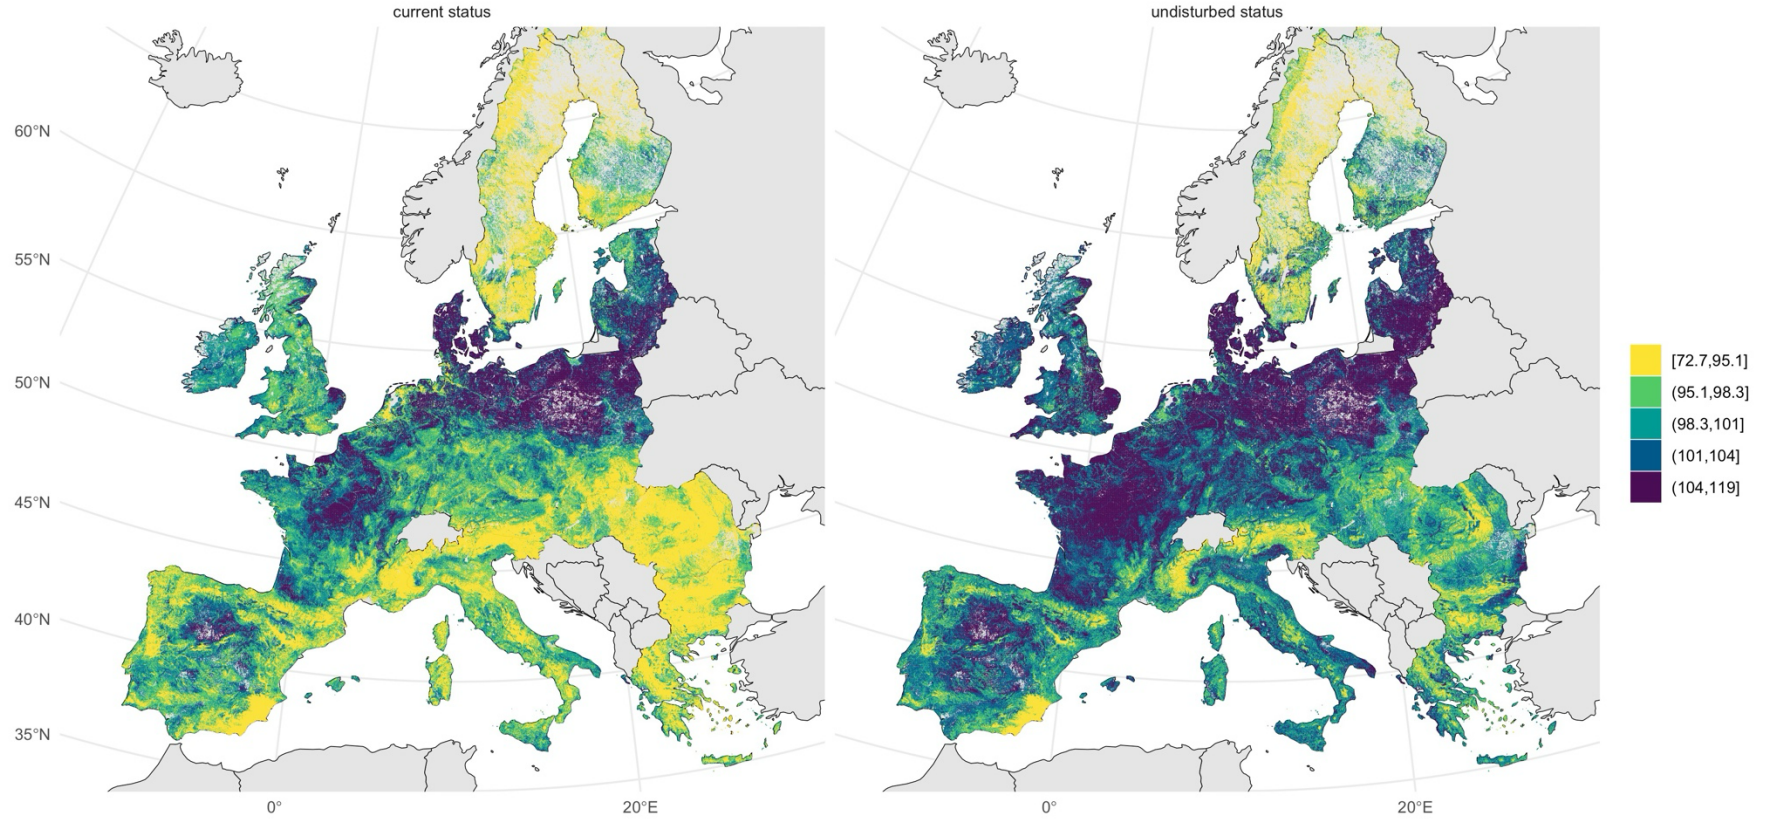

**Figure S16.** Spatial distribution of the diversity of microbivorous protists in Europe for the current status (right panel) and the undisturbed reference status (left panel).

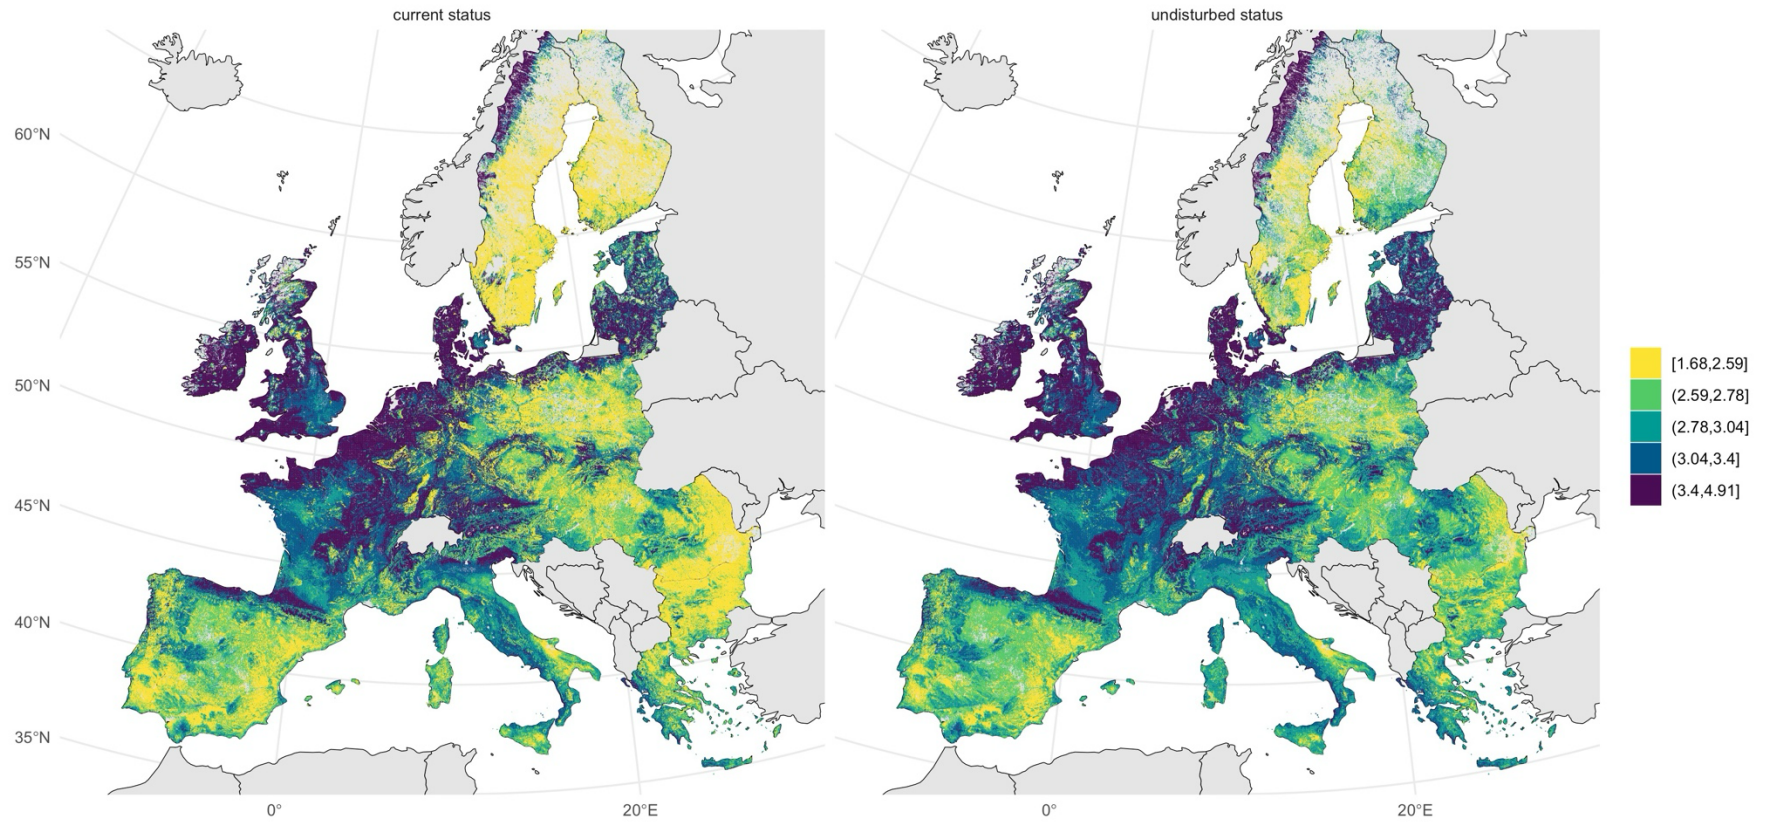

**Figure S17.** Spatial distribution of the diversity of plant pathogenic protists in Europe for the current status (right panel) and the undisturbed reference status (left panel).

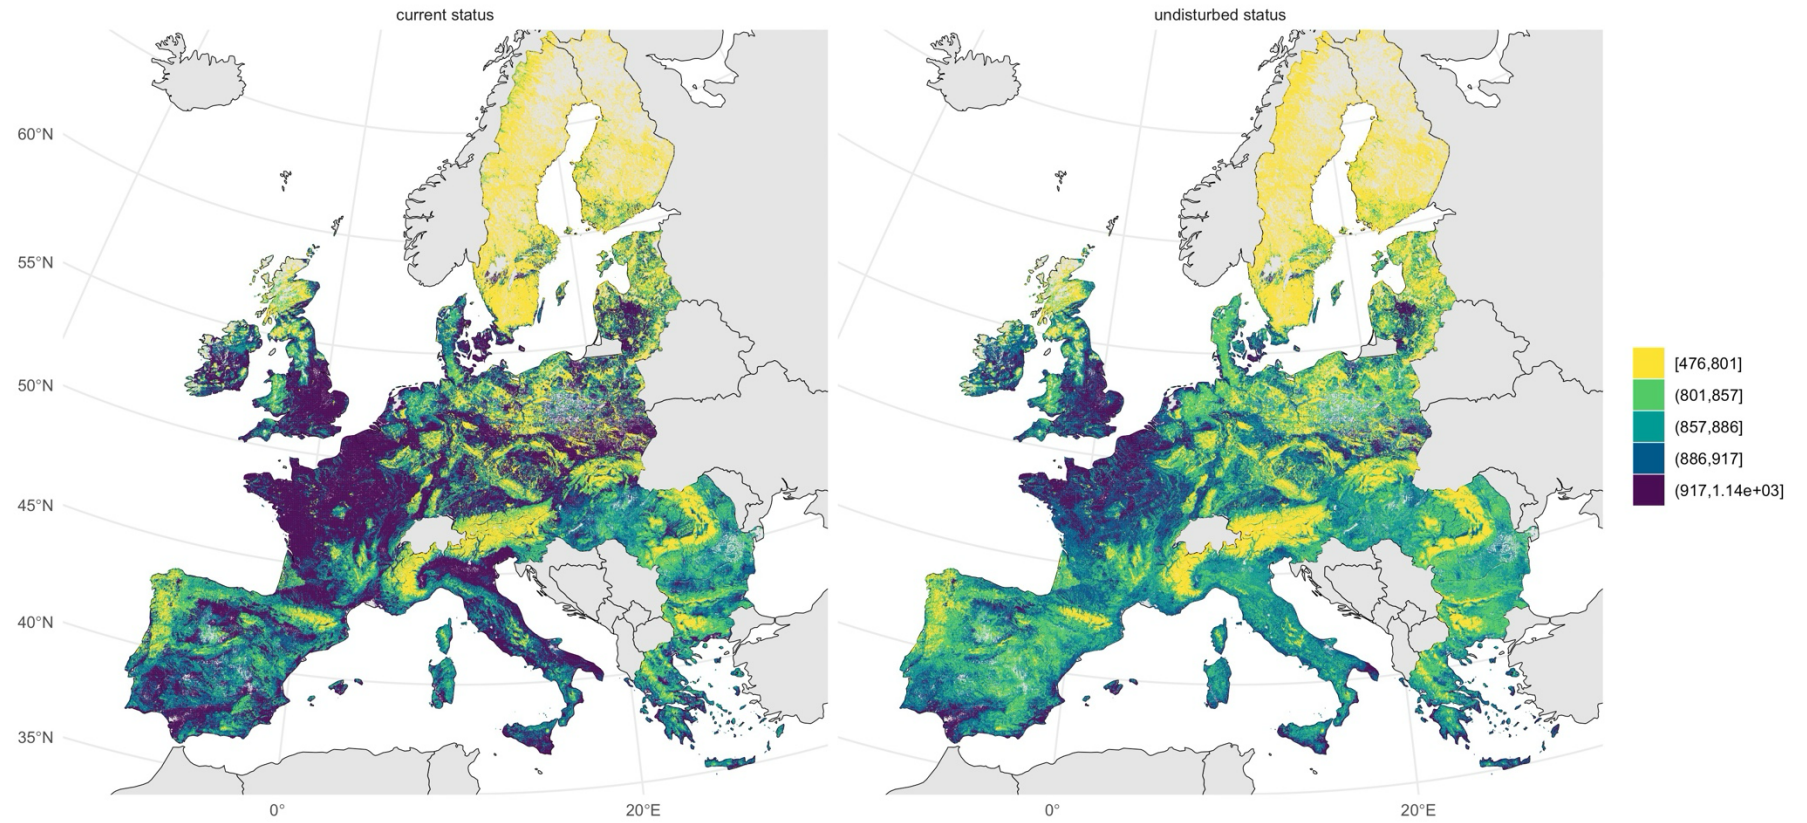

**Figure S18.** Spatial distribution of the diversity of Bacteria in Europe for the current status (right panel) and the undisturbed reference status (left panel).

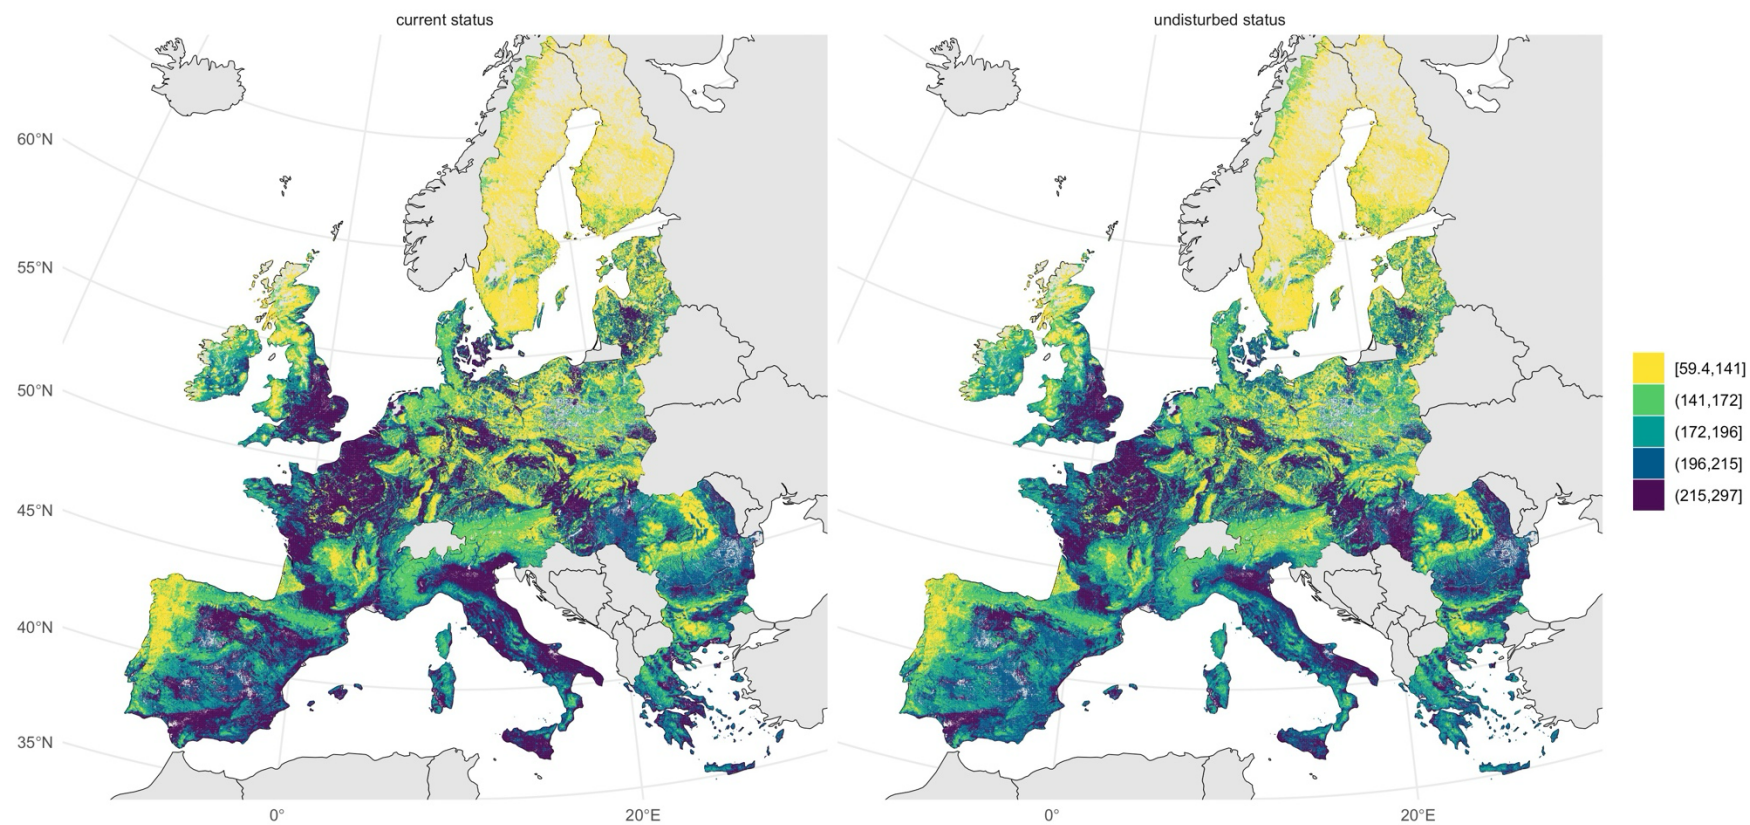

**Figure S19.** Spatial distribution of the diversity of chemoheterotrophic bacteria in Europe for the current status (right panel) and the undisturbed reference status (left panel).

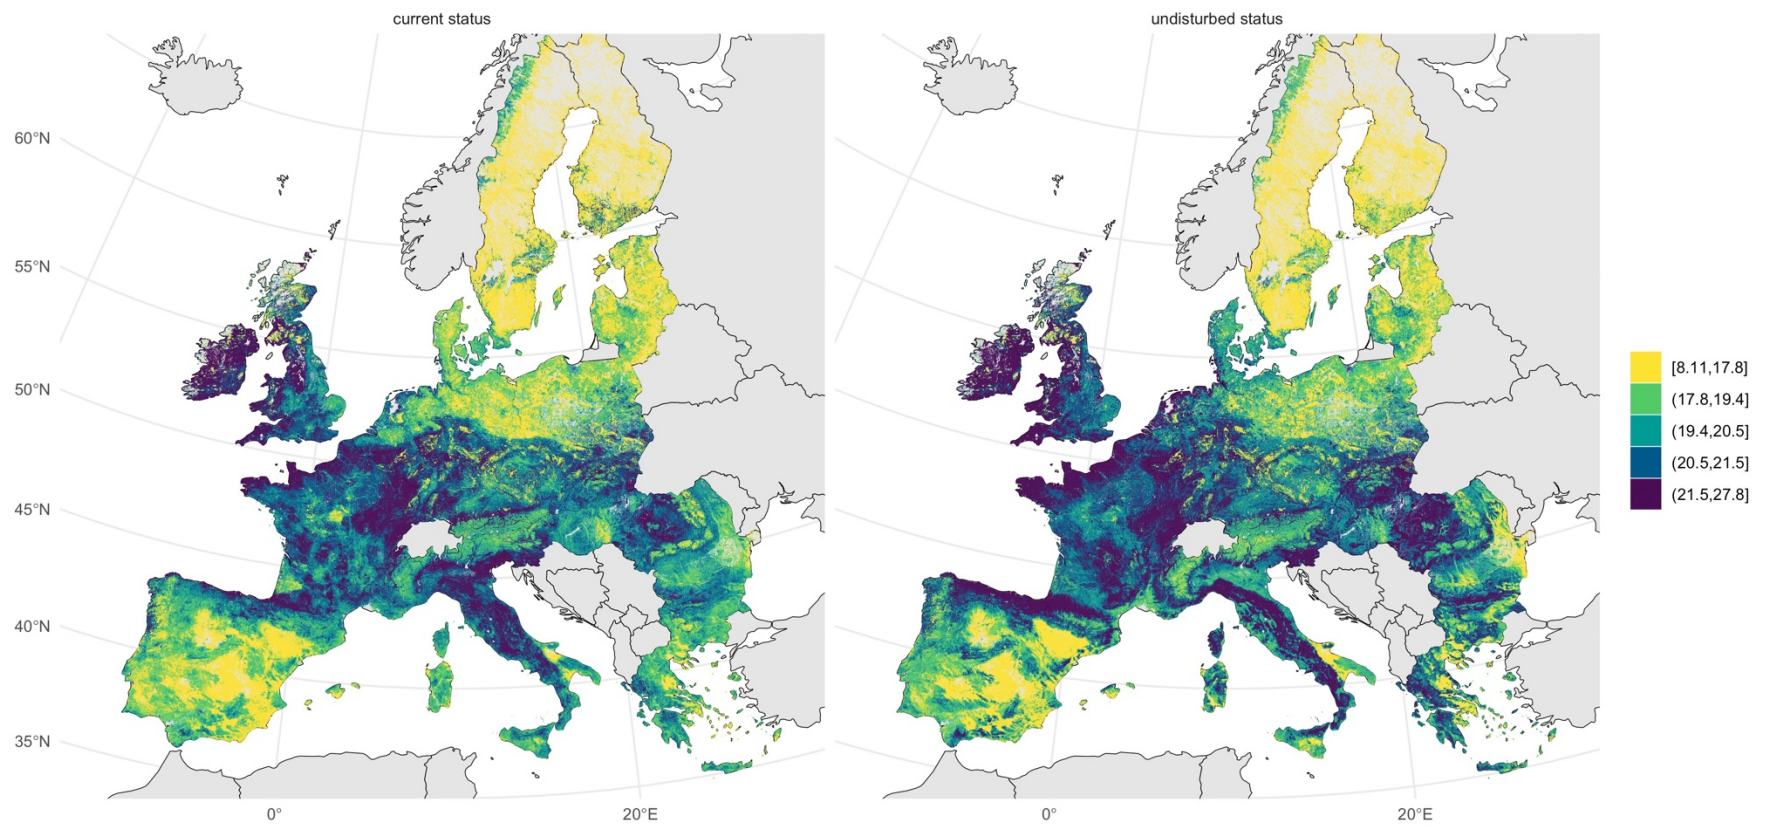

**Figure S20.** Spatial distribution of the diversity of pathogenic and parasitic bacteria in Europe for the current status (right panel) and the undisturbed reference status (left panel).

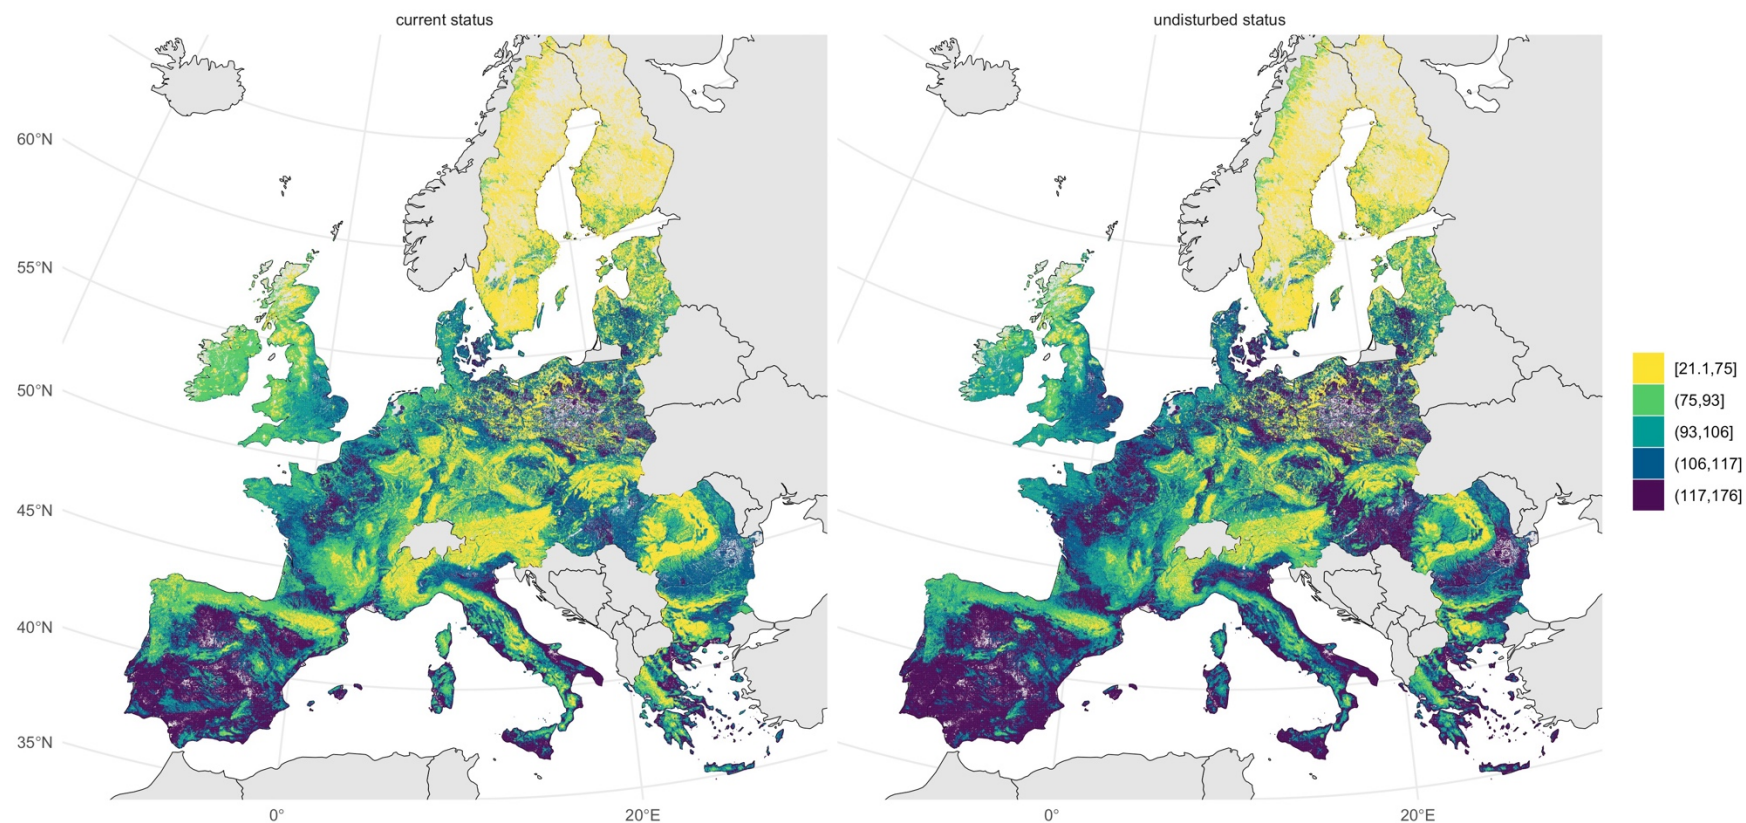

**Figure S21.** Spatial distribution of the diversity of autotrophic bacteria in Europe for the current status (right panel) and the undisturbed reference status (left panel).

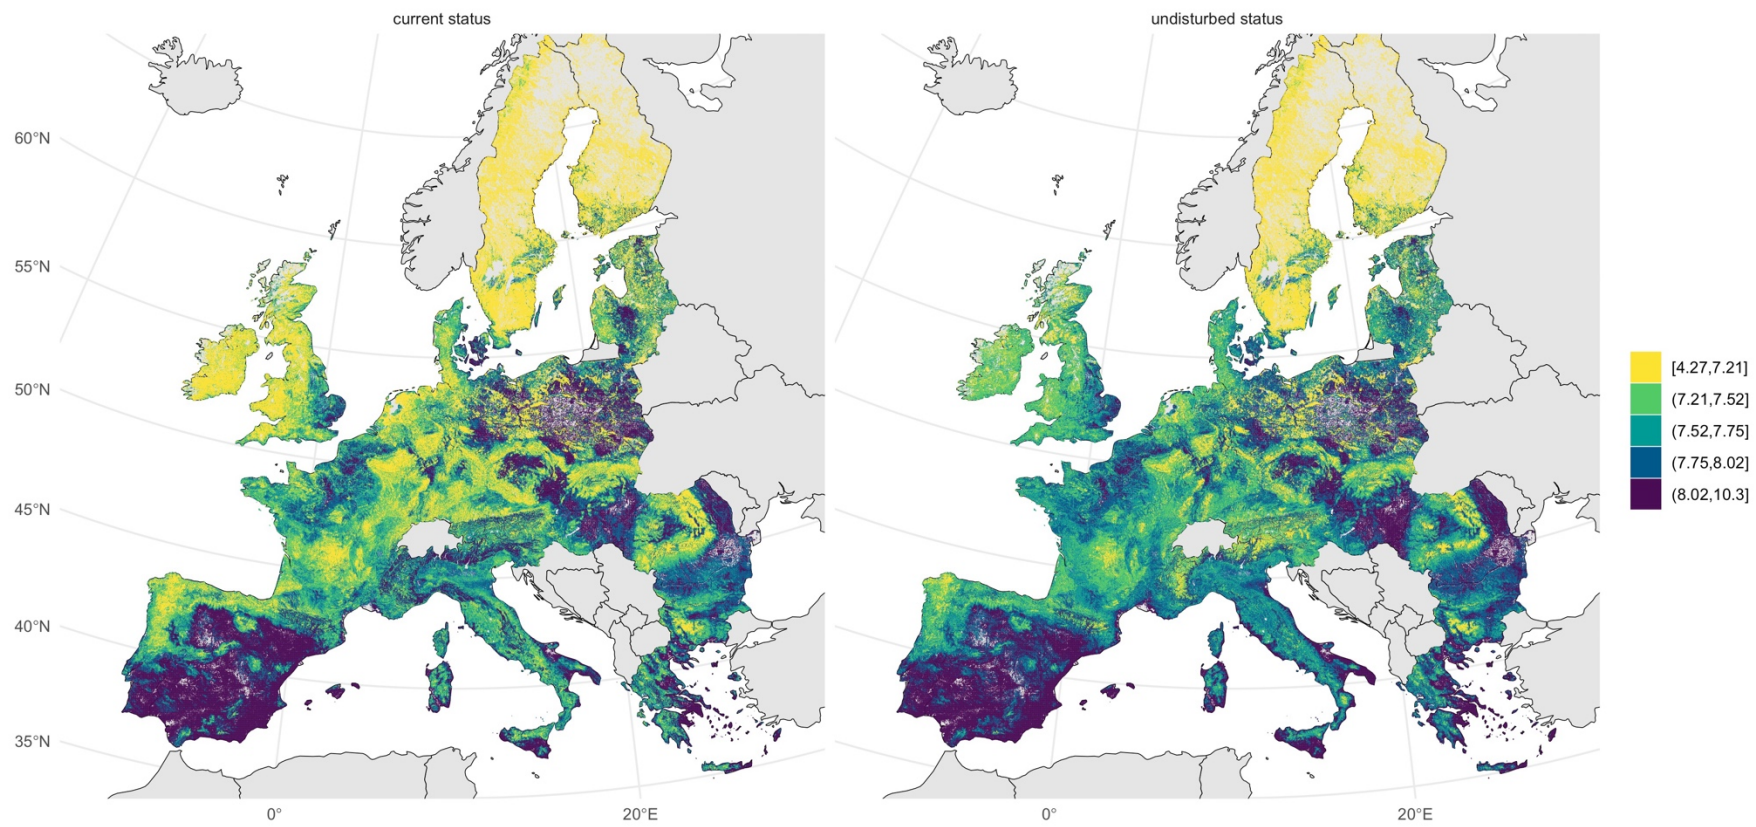

**Figure S22.** Spatial distribution of the diversity of N-cycling bacteria in Europe for the current status (right panel) and the undisturbed reference status (left panel).

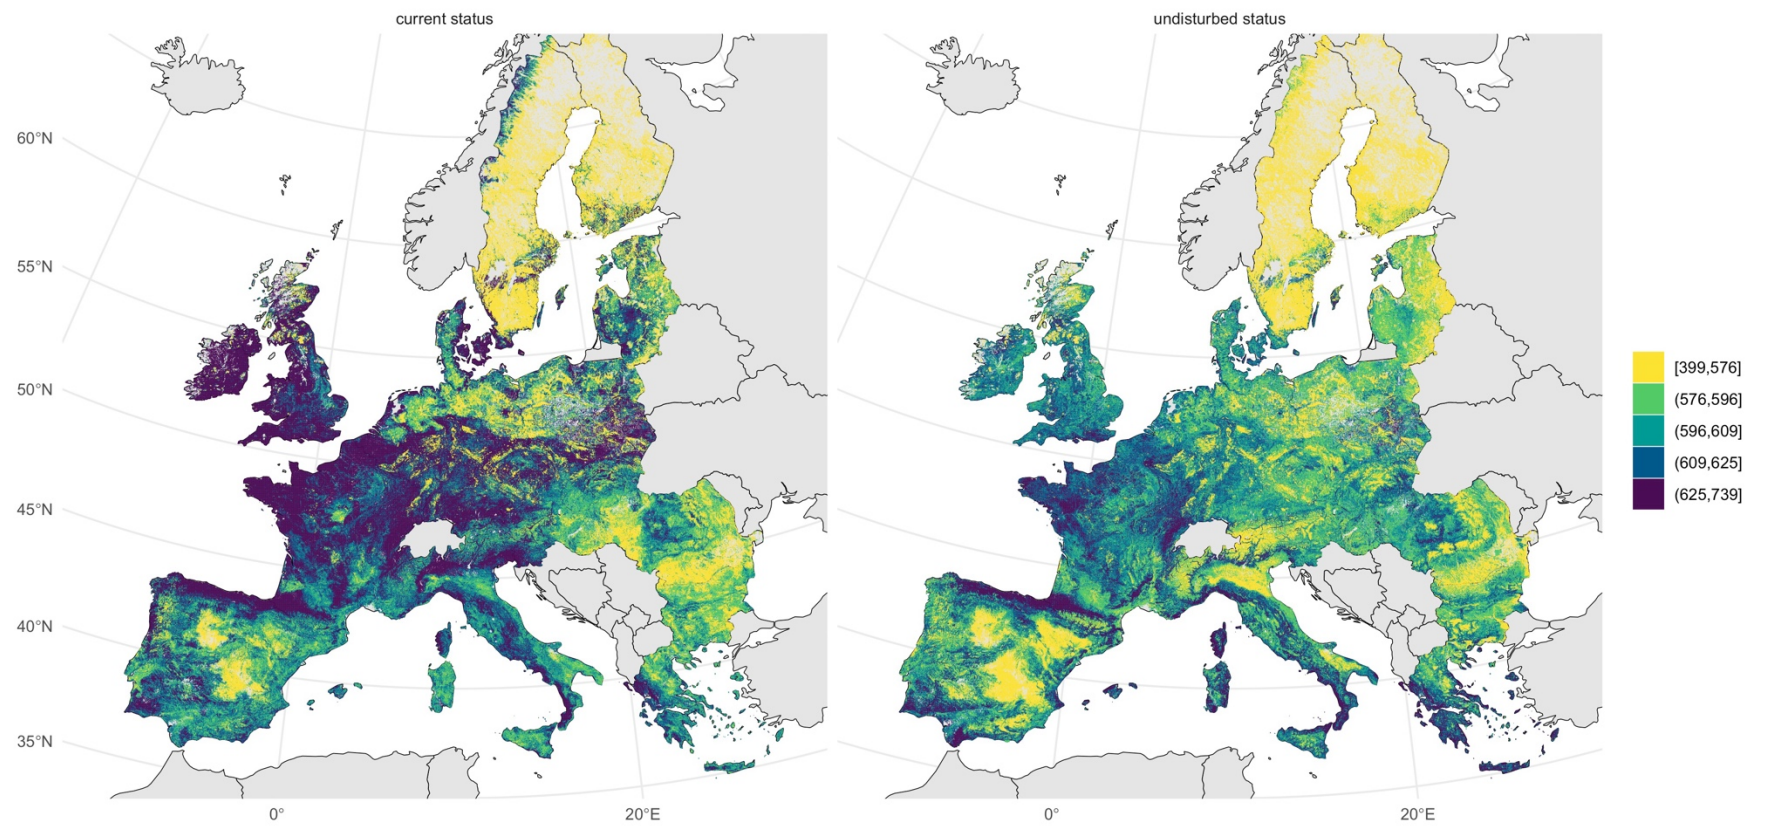

**Figure S23.** Spatial distribution of the diversity of decomposer bacteria in Europe for the current status (right panel) and the undisturbed reference status (left panel).

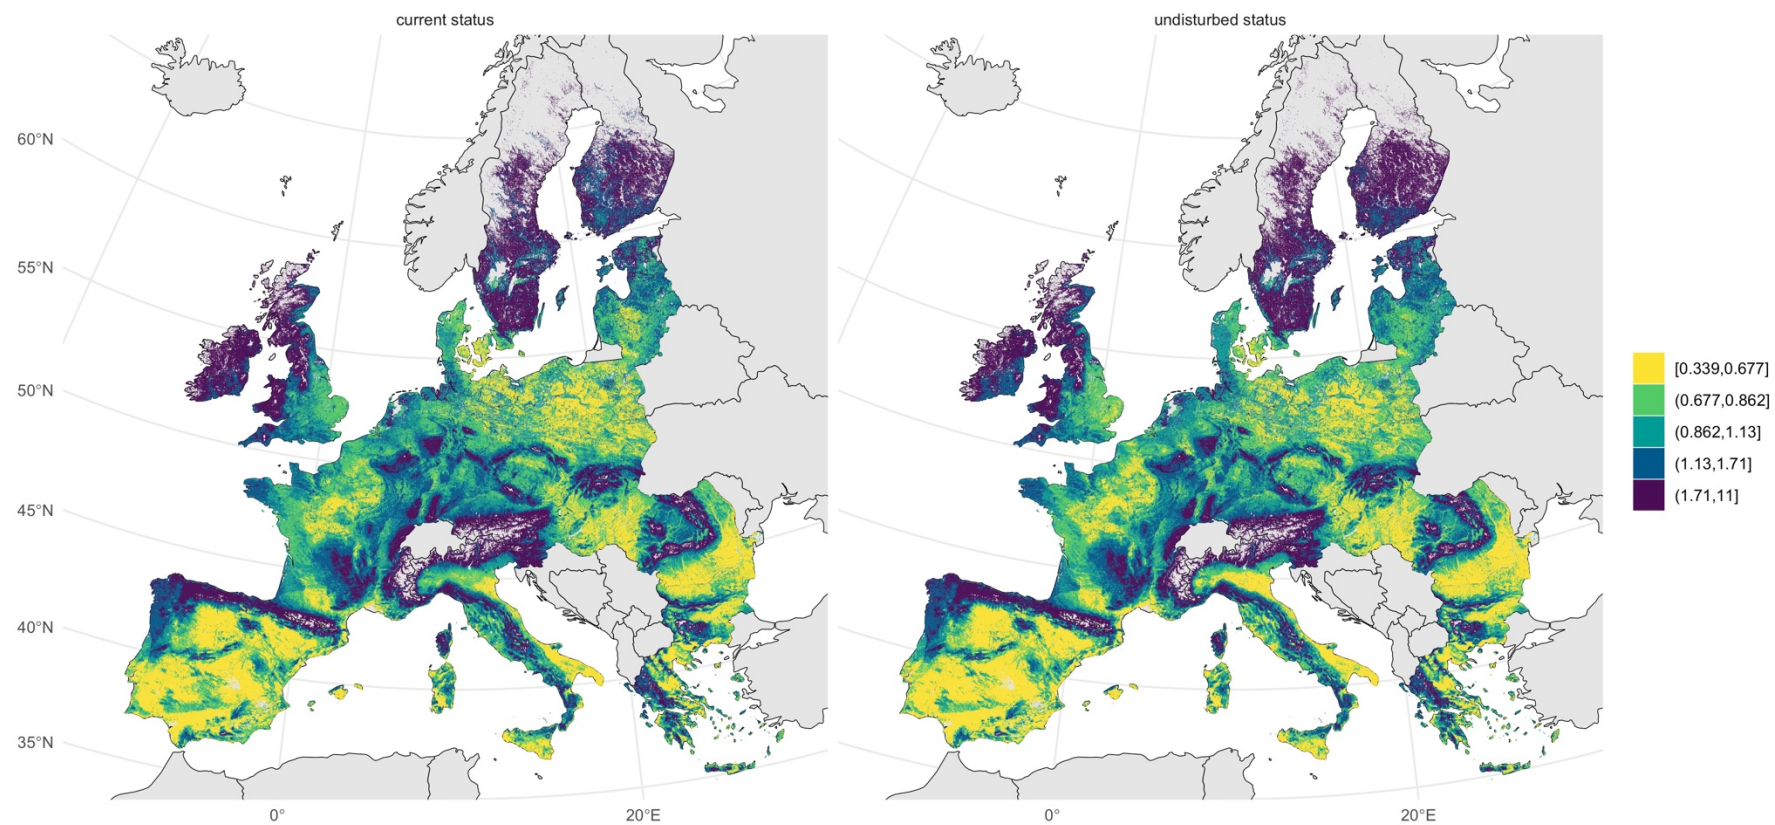

**Figure S24.** Spatial distribution of soil basal respiration in Europe for the current status (right panel) and the undisturbed reference status (left panel).

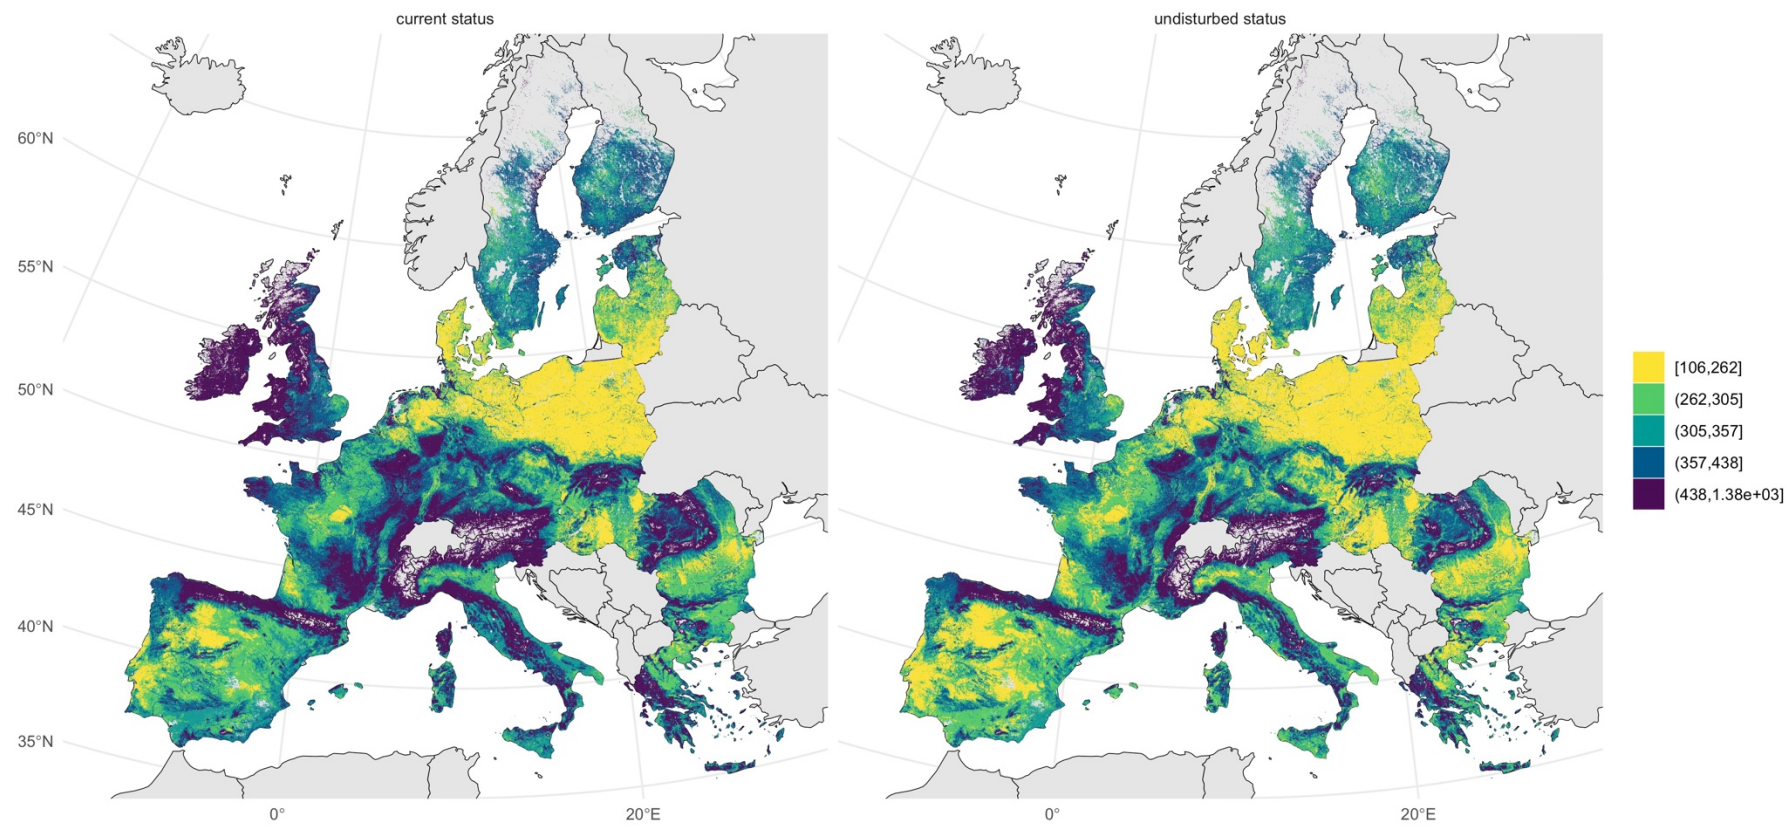

**Figure S25.** Spatial distribution of soil microbial biomass in Europe for the current status (right panel) and the undisturbed reference status (left panel).

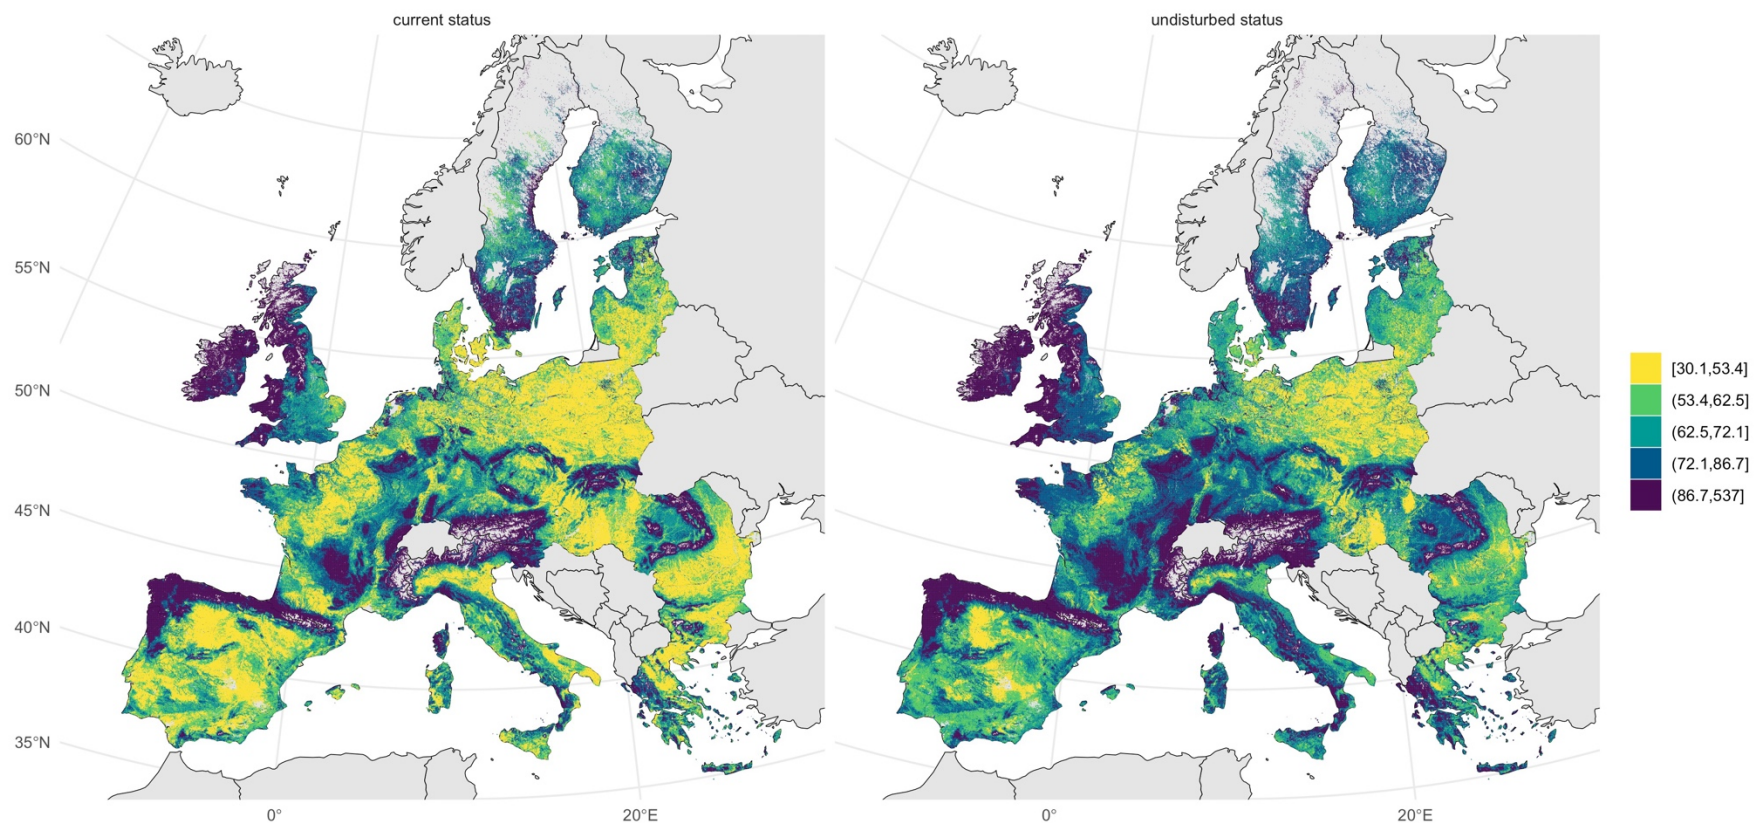

**Figure S26.** Spatial distribution of the activity potential of the enzyme Xylosidase in Europe for the current status (right panel) and the undisturbed reference status (left panel).

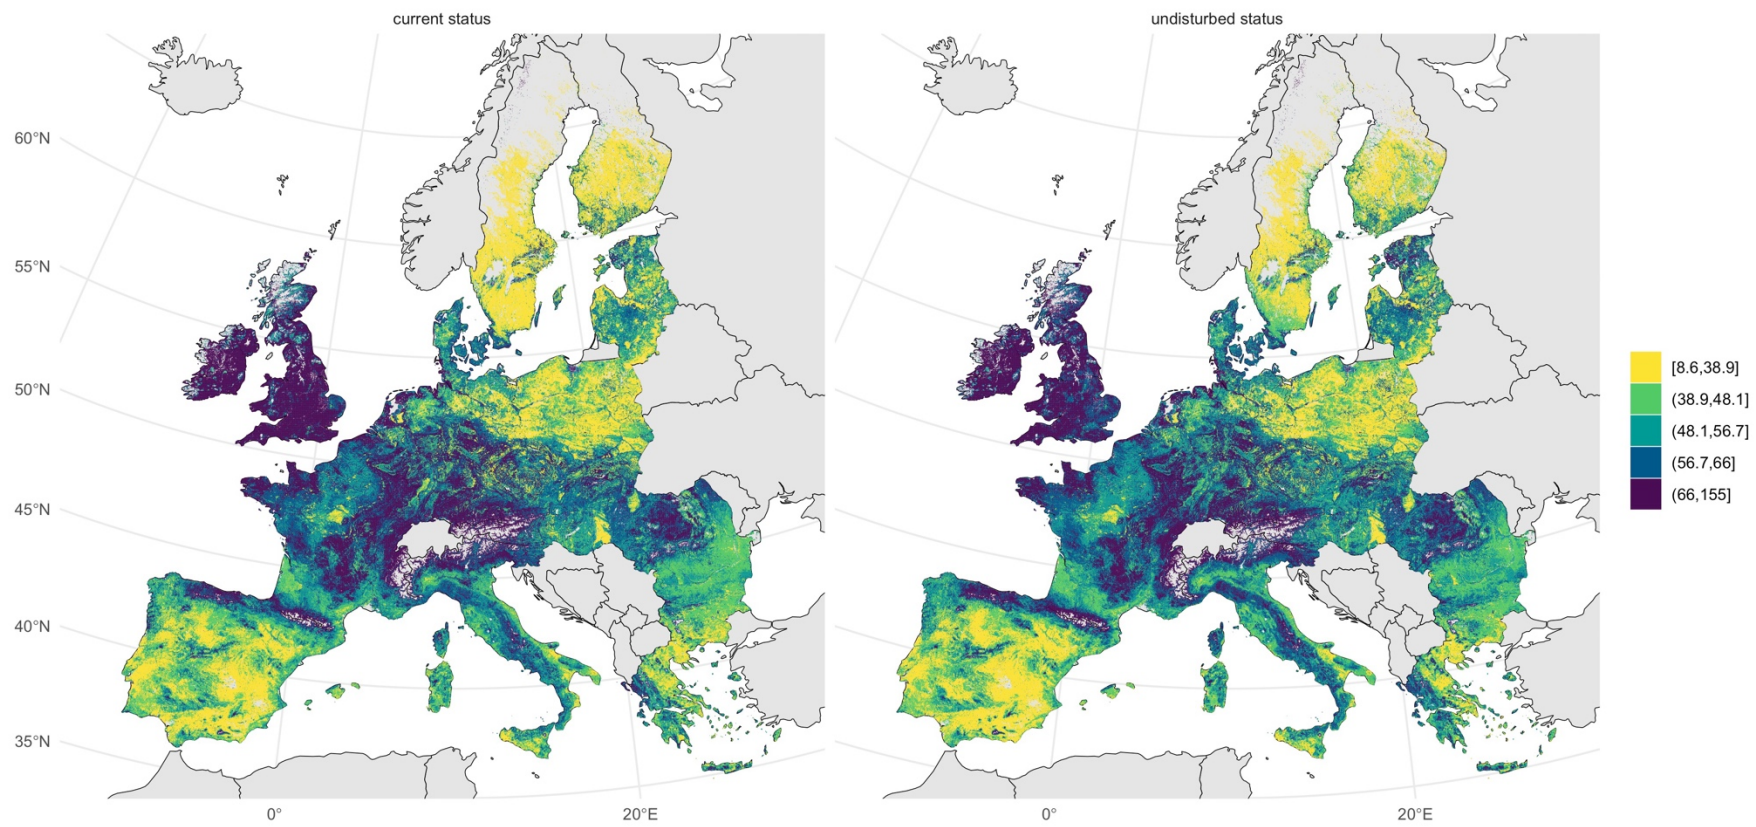

**Figure S27.** Spatial distribution of the activity potential of the enzyme Cellulase in Europe for the current status (right panel) and the undisturbed reference status (left panel).

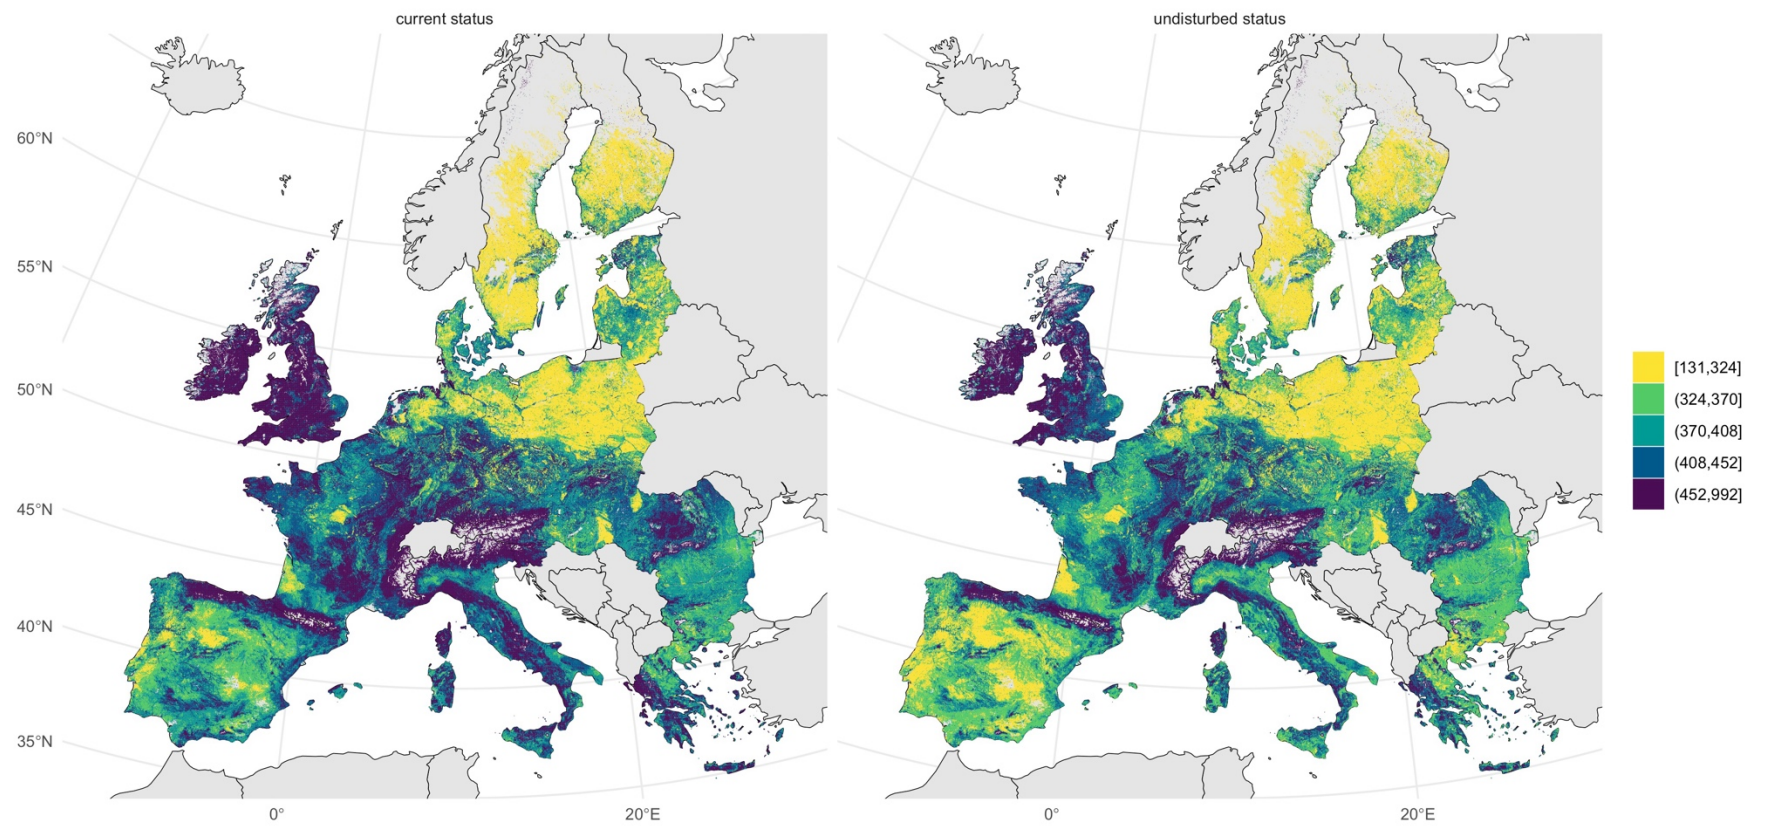

**Figure S28.** Spatial distribution of the activity potential of the enzyme Beta-glucosidase in Europe for the current status (right panel) and the undisturbed reference status (left panel).

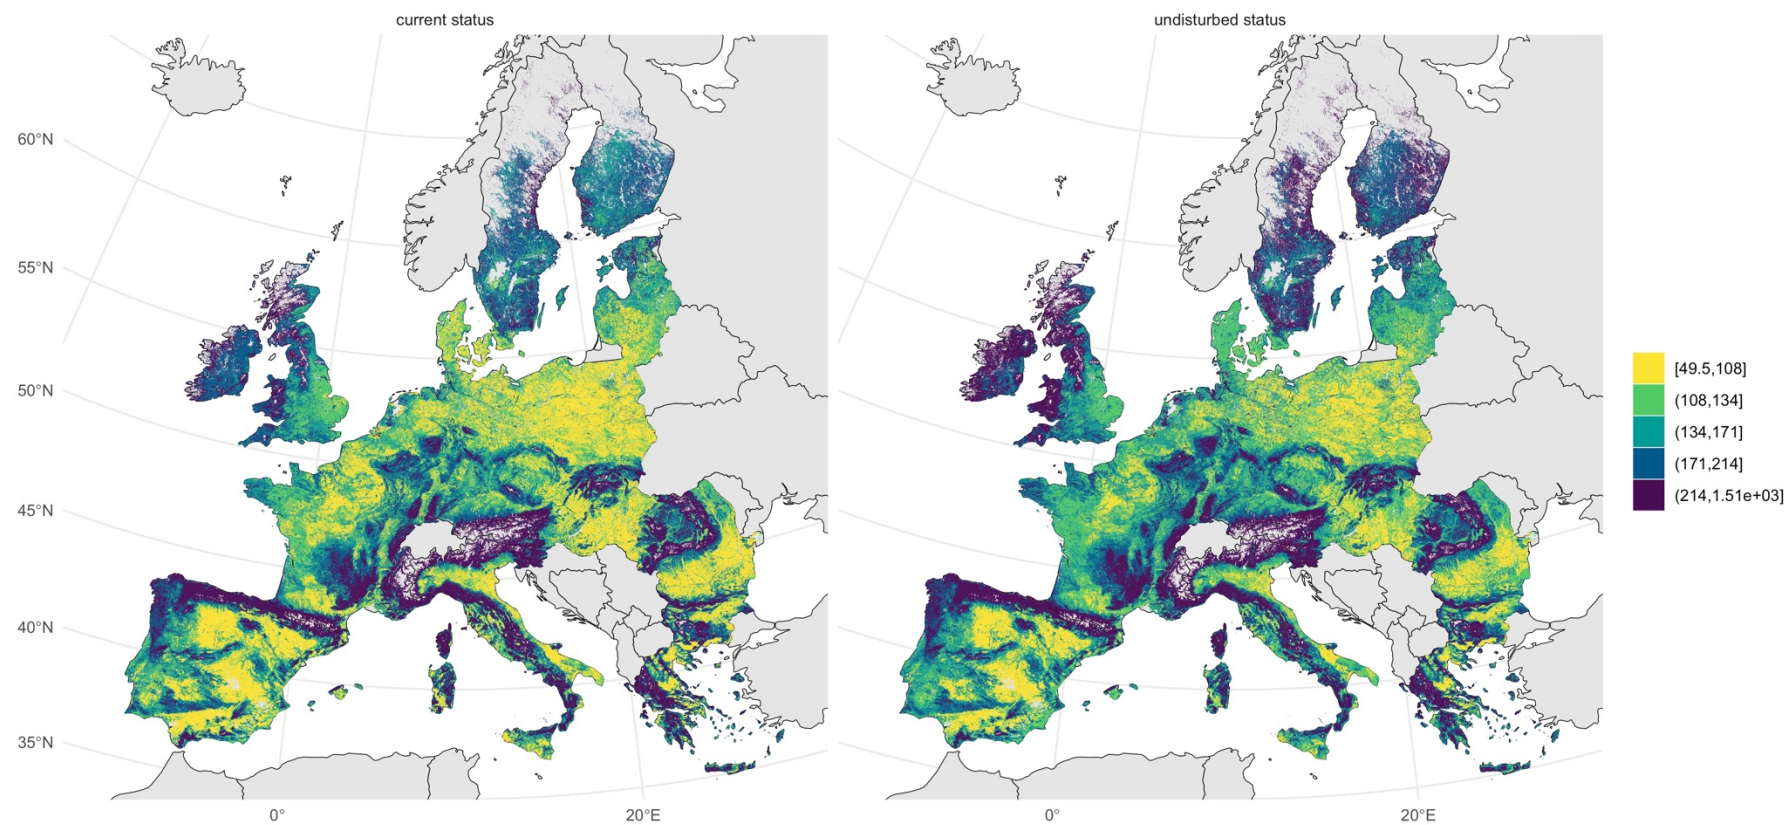

**Figure S29.** Spatial distribution of the activity potential of the enzyme N-acetyl-glucosaminidase in Europe for the current status (right panel) and the undisturbed reference status (left panel).

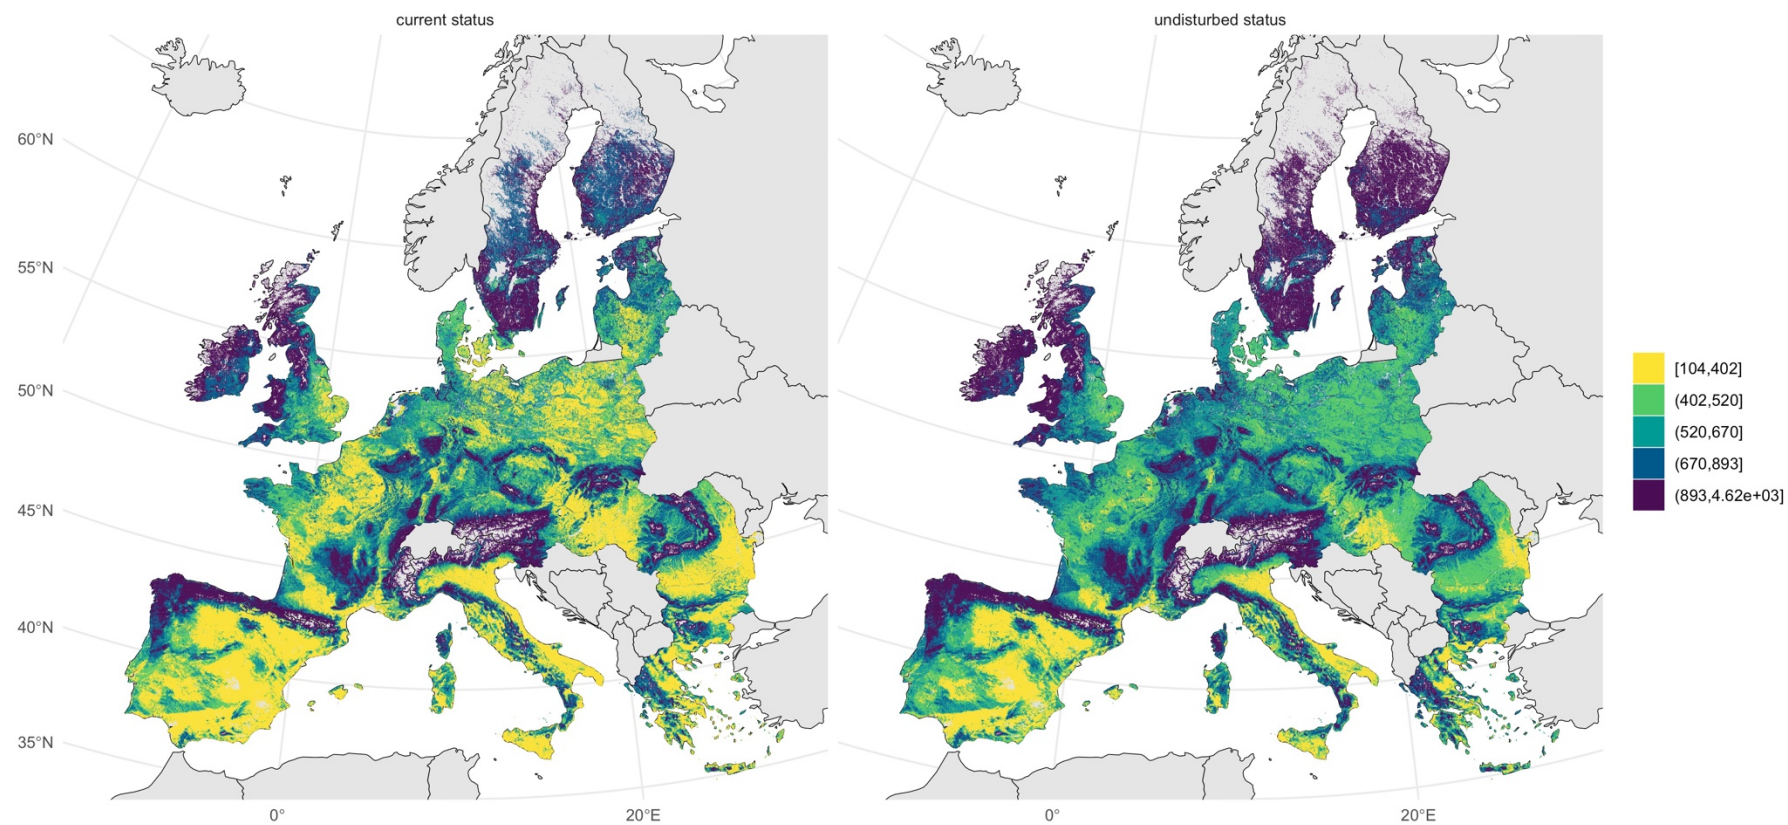

**Figure S30.** Spatial distribution of the activity potential of the enzyme Acid phosphatase in Europe for the current status (right panel) and the undisturbed reference status (left panel).
